# Supplementary material for: Cloning and Phylogenetic Analysis of Brassica napus L. Caffeic Acid O-Methyltransferase 1 Gene Family and Its Expression Pattern under Drought Stress
Source: PubMed Central journal article supplement (PMC5104432; doi:10.1371/journal.pone.0165975), 2016-11-10

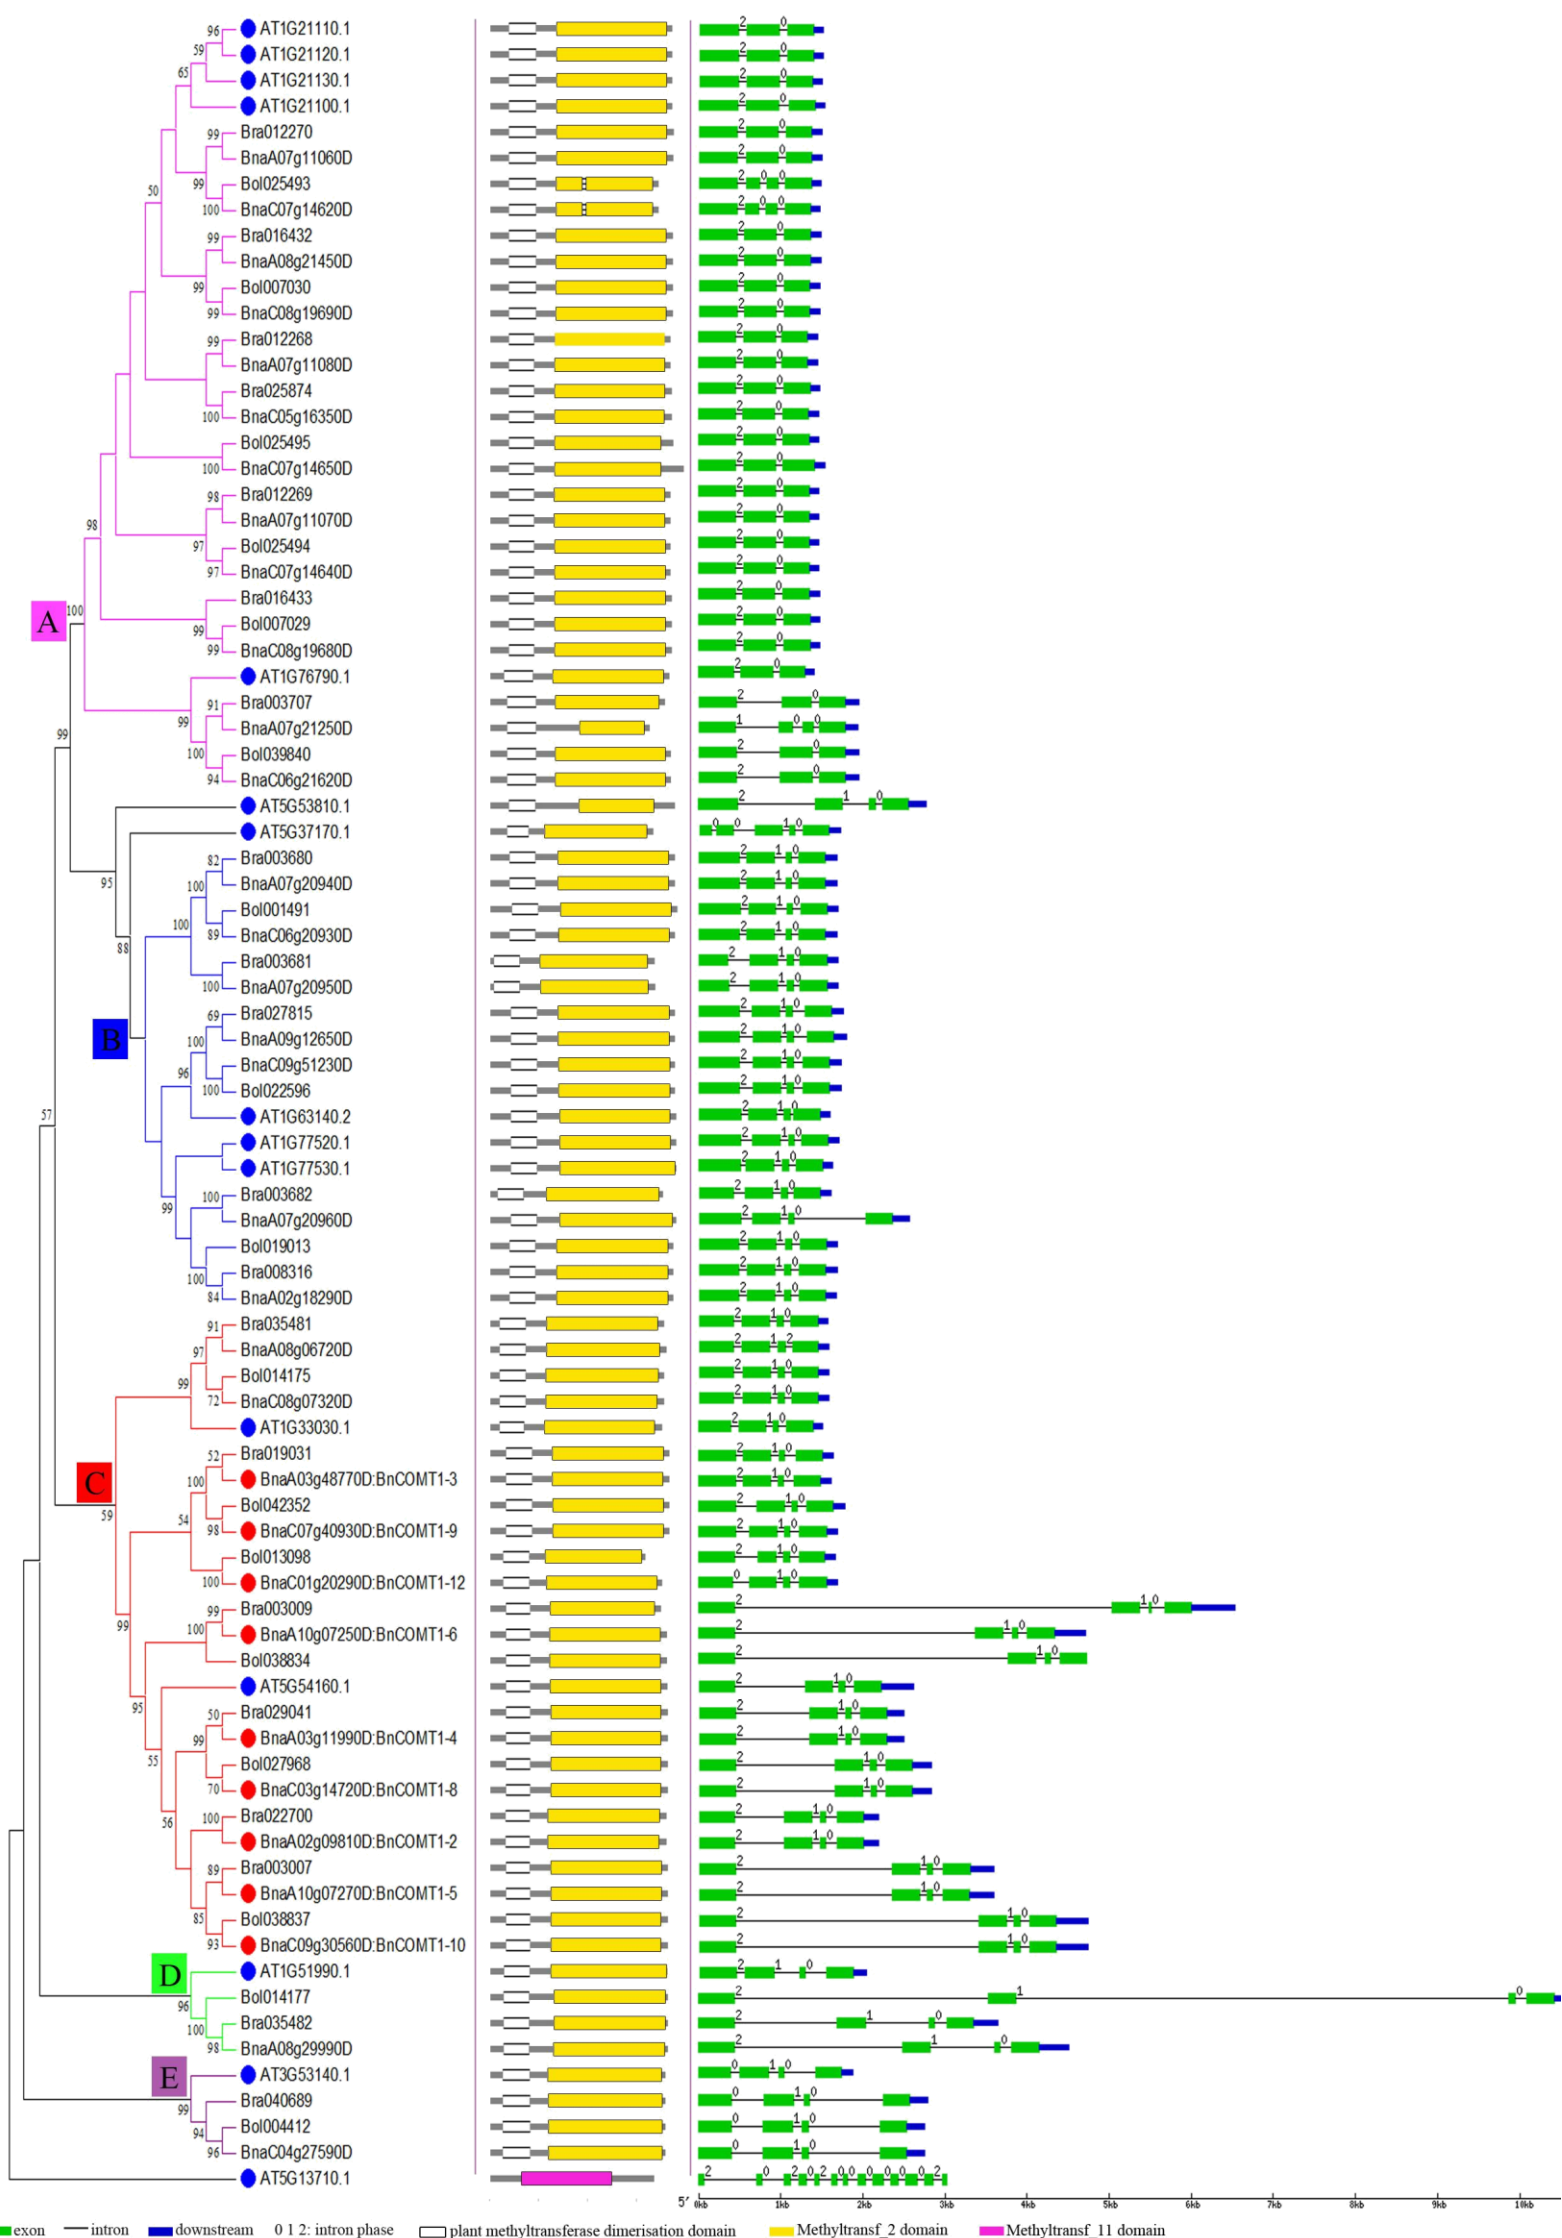

Supplement: pone.0165975.s001.pdf [file pone.0165975.s001.pdf]
