# Supplementary material for: Cloning and Phylogenetic Analysis of Brassica napus L. Caffeic Acid O-Methyltransferase 1 Gene Family and Its Expression Pattern under Drought Stress
Source: PubMed Central journal article supplement (PMC5104432; doi:10.1371/journal.pone.0165975), 2016-11-10
Supplement: pone.0165975.s002.pdf [file pone.0165975.s002.pdf]

|                           |       |                                                                                    |
|---------------------------|-------|------------------------------------------------------------------------------------|
| BnaA10g07270D:BnaCOMT1-5  | (1)   | -----                                                                              |
| Bra003007                 | (1)   | -----                                                                              |
| BnaC09g30360D:BnaCOMT1-10 | (1)   | -----                                                                              |
| Bol1038837                | (1)   | -----                                                                              |
| BnaA02g09810D:BnaCOMT1-2  | (1)   | -----                                                                              |
| Bra022700                 | (1)   | -----                                                                              |
| BnaC02g13760D:BnaCOMT1-7  | (1)   | -----                                                                              |
| Bol1037465                | (1)   | -----                                                                              |
| BnaA03g11990D:BnaCOMT1-4  | (1)   | -----                                                                              |
| Bra029041                 | (1)   | -----                                                                              |
| BnaC03g14720D:BnaCOMT1-8  | (1)   | -----                                                                              |
| Bol1027968                | (1)   | -----                                                                              |
| BnaA10g07250D:BnaCOMT1-6  | (1)   | GTAAGTATTTACGAAGCCACACTGAAAATTATCATATCAGTTACTTTTTATAAGTTATGCTTCTTGGTTGATGACTTAA    |
| Bra003009                 | (1)   | GTAAGTATTTACGAAGCCACACTGAAAATTATCATATCAGTTACTTTTTATAAGTTATGCTTCTTGGTTGATGACTTAA    |
| BnaAnng13760D:BnaCOMT1-1  | (1)   | -----                                                                              |
| Bra026320                 | (1)   | -----                                                                              |
| BnaC07g40930D:BnaCOMT1-9  | (1)   | -----                                                                              |
| Bol1042352                | (1)   | -----                                                                              |
| BnaC01g20290D:BnaCOMT1-12 | (1)   | -----                                                                              |
| Bol1013098                | (1)   | -----                                                                              |
| BnaA03g48770D:BnaCOMT1-3  | (1)   | -----                                                                              |
| Bra019031                 | (1)   | -----                                                                              |
|                           |       |                                                                                    |
| BnaA10g07270D:BnaCOMT1-5  | (1)   | -----                                                                              |
| Bra003007                 | (1)   | -----                                                                              |
| BnaC09g30360D:BnaCOMT1-10 | (1)   | -----                                                                              |
| Bol1038837                | (1)   | -----                                                                              |
| BnaA02g09810D:BnaCOMT1-2  | (1)   | -----                                                                              |
| Bra022700                 | (1)   | -----                                                                              |
| BnaC02g13760D:BnaCOMT1-7  | (1)   | -----                                                                              |
| Bol1037465                | (1)   | -----                                                                              |
| BnaA03g11990D:BnaCOMT1-4  | (1)   | -----                                                                              |
| Bra029041                 | (1)   | -----                                                                              |
| BnaC03g14720D:BnaCOMT1-8  | (1)   | -----                                                                              |
| Bol1027968                | (1)   | -----                                                                              |
| BnaA10g07250D:BnaCOMT1-6  | (81)  | TAATAATATACATAAGTGAGATCCACACAGTGCAAAGACCTTAATTTGTTACTGCACCAAAAAGTATACCGGTTCATATCAT |
| Bra003009                 | (81)  | TAATAATATACATAAGTGAGATCCACACAGTGCAAAGACCTTAATTTGTTACTGCACCAAAAAGTATACCGGTTCATATCAT |
| BnaAnng13760D:BnaCOMT1-1  | (1)   | -----                                                                              |
| Bra026320                 | (1)   | -----                                                                              |
| BnaC07g40930D:BnaCOMT1-9  | (1)   | -----                                                                              |
| Bol1042352                | (1)   | -----                                                                              |
| BnaC01g20290D:BnaCOMT1-12 | (1)   | -----                                                                              |
| Bol1013098                | (1)   | -----                                                                              |
| BnaA03g48770D:BnaCOMT1-3  | (1)   | -----                                                                              |
| Bra019031                 | (1)   | -----                                                                              |
|                           |       |                                                                                    |
| BnaA10g07270D:BnaCOMT1-5  | (1)   | -----                                                                              |
| Bra003007                 | (1)   | -----                                                                              |
| BnaC09g30360D:BnaCOMT1-10 | (1)   | -----                                                                              |
| Bol1038837                | (1)   | -----                                                                              |
| BnaA02g09810D:BnaCOMT1-2  | (1)   | -----                                                                              |
| Bra022700                 | (1)   | -----                                                                              |
| BnaC02g13760D:BnaCOMT1-7  | (1)   | -----                                                                              |
| Bol1037465                | (1)   | -----                                                                              |
| BnaA03g11990D:BnaCOMT1-4  | (1)   | -----                                                                              |
| Bra029041                 | (1)   | -----                                                                              |
| BnaC03g14720D:BnaCOMT1-8  | (1)   | -----                                                                              |
| Bol1027968                | (1)   | -----                                                                              |
| BnaA10g07250D:BnaCOMT1-6  | (161) | TGGTTACAACGATTAACAGACTGGAGAACAAAATAATTTTAAATAATTATAGGAAAAA-----AAATAGA             |
| Bra003009                 | (161) | TGGTTACAACGATTAACAGACTGGAGAACAAAATAATTTTAAATAATTATAGGAAAAAATAATATATAAAAAAAATAGA    |
| BnaAnng13760D:BnaCOMT1-1  | (1)   | -----                                                                              |
| Bra026320                 | (1)   | -----                                                                              |
| BnaC07g40930D:BnaCOMT1-9  | (1)   | -----                                                                              |
| Bol1042352                | (1)   | -----                                                                              |
| BnaC01g20290D:BnaCOMT1-12 | (1)   | -----                                                                              |
| Bol1013098                | (1)   | -----                                                                              |
| BnaA03g48770D:BnaCOMT1-3  | (1)   | -----                                                                              |
| Bra019031                 | (1)   | -----                                                                              |
|                           |       |                                                                                    |
| BnaA10g07270D:BnaCOMT1-5  | (1)   | -----                                                                              |
| Bra003007                 | (1)   | -----                                                                              |
| BnaC09g30360D:BnaCOMT1-10 | (1)   | -----                                                                              |
| Bol1038837                | (1)   | -----                                                                              |
| BnaA02g09810D:BnaCOMT1-2  | (1)   | -----                                                                              |
| Bra022700                 | (1)   | -----                                                                              |
| BnaC02g13760D:BnaCOMT1-7  | (1)   | -----                                                                              |
| Bol1037465                | (1)   | -----                                                                              |
| BnaA03g11990D:BnaCOMT1-4  | (1)   | -----                                                                              |
| Bra029041                 | (1)   | -----                                                                              |
| BnaC03g14720D:BnaCOMT1-8  | (1)   | -----                                                                              |
| Bol1027968                | (1)   | -----                                                                              |
| BnaA10g07250D:BnaCOMT1-6  | (227) | TAAAAAGGCATAAATTCAAAGTACGGGGTACTATGTTGGATTGGTCATCAATAAGATGGCCGACATCACTTGCTTTTAGA   |
| Bra003009                 | (241) | TAAAAAGGCATAAATTCAAAGTACGGGGTACTATGTTGGATTGGTCATCAATAAGATGGCCGACATCACTTGCTTTTAGA   |
| BnaAnng13760D:BnaCOMT1-1  | (1)   | -----                                                                              |
| Bra026320                 | (1)   | -----                                                                              |
| BnaC07g40930D:BnaCOMT1-9  | (1)   | -----                                                                              |
| Bol1042352                | (1)   | -----                                                                              |
| BnaC01g20290D:BnaCOMT1-12 | (1)   | -----                                                                              |
| Bol1013098                | (1)   | -----                                                                              |
| BnaA03g48770D:BnaCOMT1-3  | (1)   | -----                                                                              |
| Bra019031                 | (1)   | -----                                                                              |

BnaA10g07270D:BnaCOMT1-5 (1) -----  
Bra003007 (1) -----  
BnaC09g30360D:BnaCOMT1-10 (1) -----  
Bol038837 (1) -----  
BnaA02g09810D:BnaCOMT1-2 (1) -----  
Bra022700 (1) -----  
BnaC02g13760D:BnaCOMT1-7 (1) -----  
Bol037465 (1) -----  
BnaA03g11990D:BnaCOMT1-4 (1) -----  
Bra029041 (1) -----  
BnaC03g14720D:BnaCOMT1-8 (1) -----  
Bol027968 (1) -----  
BnaA10g07250D:BnaCOMT1-6 (307) GCGTCCATTTATCGATCTAATATTACGTGTGGCCACAATCAAGATCAGCTTACGTTGTATAAAGAAAACACAATGGTCCC  
Bra003009 (321) GCGTCCATTTATCGATCTAATATTACGTGTGGCCACAATCAAGATCAGCTTACGTTGTATAAAGAAAACACAATGGTCCC  
BnaAnng13760D:BnaCOMT1-1 (1) -----  
Bra026320 (1) -----  
BnaC07g40930D:BnaCOMT1-9 (1) -----  
Bol042352 (1) -----  
BnaC01g20290D:BnaCOMT1-12 (1) -----  
Bol013098 (1) -----  
BnaA03g48770D:BnaCOMT1-3 (1) -----  
Bra019031 (1) -----  
  
BnaA10g07270D:BnaCOMT1-5 (1) -----  
Bra003007 (1) -----  
BnaC09g30360D:BnaCOMT1-10 (1) -----  
Bol038837 (1) -----  
BnaA02g09810D:BnaCOMT1-2 (1) -----  
Bra022700 (1) -----  
BnaC02g13760D:BnaCOMT1-7 (1) -----  
Bol037465 (1) -----  
BnaA03g11990D:BnaCOMT1-4 (1) -----  
Bra029041 (1) -----  
BnaC03g14720D:BnaCOMT1-8 (1) -----  
Bol027968 (1) -----  
BnaA10g07250D:BnaCOMT1-6 (387) TCCGTTGTAAAGGATTTATCTAACTCTGTTCAAAAGAGTTACAAATCAGAAAGTAATACTATTTAAGTTTAAGAATTATA  
Bra003009 (401) TCCGTTGTAAAGGATTTATCTAACTCTGTTCAAAAGAGTTACAAATCAGAAAGTAATACTATTTAAGTTTAAGAATTATA  
BnaAnng13760D:BnaCOMT1-1 (1) -----  
Bra026320 (1) -----  
BnaC07g40930D:BnaCOMT1-9 (1) -----  
Bol042352 (1) -----  
BnaC01g20290D:BnaCOMT1-12 (1) -----  
Bol013098 (1) -----  
BnaA03g48770D:BnaCOMT1-3 (1) -----  
Bra019031 (1) -----  
  
BnaA10g07270D:BnaCOMT1-5 (1) -----  
Bra003007 (1) -----  
BnaC09g30360D:BnaCOMT1-10 (1) -----  
Bol038837 (1) -----  
BnaA02g09810D:BnaCOMT1-2 (1) -----  
Bra022700 (1) -----  
BnaC02g13760D:BnaCOMT1-7 (1) -----  
Bol037465 (1) -----  
BnaA03g11990D:BnaCOMT1-4 (1) -----  
Bra029041 (1) -----  
BnaC03g14720D:BnaCOMT1-8 (1) -----  
Bol027968 (1) -----  
BnaA10g07250D:BnaCOMT1-6 (467) TTGAGATACAAATTGTGGCGAATGCATGCTGCTTTTTTTTACTGGGGGAAAACATAACCAGACTATTTAGTTTAATACT  
Bra003009 (481) TTGAGATACAAATTGTGGCGAATGCATGCTGCTTTTTTTTACTGGGGGAAAACATAACCAGACTATTTAGTTTAATACT  
BnaAnng13760D:BnaCOMT1-1 (1) -----  
Bra026320 (1) -----  
BnaC07g40930D:BnaCOMT1-9 (1) -----  
Bol042352 (1) -----  
BnaC01g20290D:BnaCOMT1-12 (1) -----  
Bol013098 (1) -----  
BnaA03g48770D:BnaCOMT1-3 (1) -----  
Bra019031 (1) -----  
  
BnaA10g07270D:BnaCOMT1-5 (1) -----  
Bra003007 (1) -----  
BnaC09g30360D:BnaCOMT1-10 (1) -----  
Bol038837 (1) -----  
BnaA02g09810D:BnaCOMT1-2 (1) -----  
Bra022700 (1) -----  
BnaC02g13760D:BnaCOMT1-7 (1) -----  
Bol037465 (1) -----  
BnaA03g11990D:BnaCOMT1-4 (1) -----  
Bra029041 (1) -----  
BnaC03g14720D:BnaCOMT1-8 (1) -----  
Bol027968 (1) -----  
BnaA10g07250D:BnaCOMT1-6 (547) AACTAGATTTTGTATCCGCGAGTTTGCCTAGATATATTTTTTTTAAAAATATGATTCTATTTGTTTTTATGTCACATTTAG  
Bra003009 (561) AACTAGATTTTGTATCCGCGAGTTTGCCTAGATATATTTTTTTTAAAAATATGATTCTATTTGTTTTTATGTCACATTTAG  
BnaAnng13760D:BnaCOMT1-1 (1) -----  
Bra026320 (1) -----  
BnaC07g40930D:BnaCOMT1-9 (1) -----  
Bol042352 (1) -----  
BnaC01g20290D:BnaCOMT1-12 (1) -----  
Bol013098 (1) -----  
BnaA03g48770D:BnaCOMT1-3 (1) -----  
Bra019031 (1) -----

|                           |       |                                                                                    |
|---------------------------|-------|------------------------------------------------------------------------------------|
| BnaA10g07270D:BnaCOMT1-5  | (1)   | -----                                                                              |
| Bra003007                 | (1)   | -----                                                                              |
| BnaC09g30360D:BnaCOMT1-10 | (1)   | -----                                                                              |
| Bol038837                 | (1)   | -----                                                                              |
| BnaA02g09810D:BnaCOMT1-2  | (1)   | -----                                                                              |
| Bra022700                 | (1)   | -----                                                                              |
| BnaC02g13760D:BnaCOMT1-7  | (1)   | -----                                                                              |
| Bol037465                 | (1)   | -----                                                                              |
| BnaA03g11990D:BnaCOMT1-4  | (1)   | -----                                                                              |
| Bra029041                 | (1)   | -----                                                                              |
| BnaC03g14720D:BnaCOMT1-8  | (1)   | -----                                                                              |
| Bol027968                 | (1)   | -----                                                                              |
| BnaA10g07250D:BnaCOMT1-6  | (627) | GGTTGGGCAAAAACACTCGAATTTCGAAGAACCGAACGGATCCCAATCCGAATAAATAGTACCAAAATCCGAACCAAAATTG |
| Bra003009                 | (641) | GGTTGGGCAAAAACACTCGAATTTCGAAGAACCGAACGGATCCCAATCCGAATAAATAGTACCAAAATCCGAACCAAAATTG |
| BnaAnng13760D:BnaCOMT1-1  | (1)   | -----                                                                              |
| Bra026320                 | (1)   | -----                                                                              |
| BnaC07g40930D:BnaCOMT1-9  | (1)   | -----                                                                              |
| Bol042352                 | (1)   | -----                                                                              |
| BnaC01g20290D:BnaCOMT1-12 | (1)   | -----                                                                              |
| Bol013098                 | (1)   | -----                                                                              |
| BnaA03g48770D:BnaCOMT1-3  | (1)   | -----                                                                              |
| Bra019031                 | (1)   | -----                                                                              |
|                           |       |                                                                                    |
| BnaA10g07270D:BnaCOMT1-5  | (1)   | -----                                                                              |
| Bra003007                 | (1)   | -----                                                                              |
| BnaC09g30360D:BnaCOMT1-10 | (1)   | -----                                                                              |
| Bol038837                 | (1)   | -----                                                                              |
| BnaA02g09810D:BnaCOMT1-2  | (1)   | -----                                                                              |
| Bra022700                 | (1)   | -----                                                                              |
| BnaC02g13760D:BnaCOMT1-7  | (1)   | -----                                                                              |
| Bol037465                 | (1)   | -----                                                                              |
| BnaA03g11990D:BnaCOMT1-4  | (1)   | -----                                                                              |
| Bra029041                 | (1)   | -----                                                                              |
| BnaC03g14720D:BnaCOMT1-8  | (1)   | -----                                                                              |
| Bol027968                 | (1)   | -----                                                                              |
| BnaA10g07250D:BnaCOMT1-6  | (707) | ATTAATAATCCAAATTATTCAAAATTTTGGTATTTGAAAACTGAAACTTAATCTGATCCGAACCAGAGTATTTGGGTA     |
| Bra003009                 | (721) | ATTAATAATCCAAATTATTCAAAATTTTGGTATTTGAAAACTGAAACTTAATCTGATCCGAACCAGAGTATTTGGGTA     |
| BnaAnng13760D:BnaCOMT1-1  | (1)   | -----                                                                              |
| Bra026320                 | (1)   | -----                                                                              |
| BnaC07g40930D:BnaCOMT1-9  | (1)   | -----                                                                              |
| Bol042352                 | (1)   | -----                                                                              |
| BnaC01g20290D:BnaCOMT1-12 | (1)   | -----                                                                              |
| Bol013098                 | (1)   | -----                                                                              |
| BnaA03g48770D:BnaCOMT1-3  | (1)   | -----                                                                              |
| Bra019031                 | (1)   | -----                                                                              |
|                           |       |                                                                                    |
| BnaA10g07270D:BnaCOMT1-5  | (1)   | -----                                                                              |
| Bra003007                 | (1)   | -----                                                                              |
| BnaC09g30360D:BnaCOMT1-10 | (1)   | -----                                                                              |
| Bol038837                 | (1)   | -----                                                                              |
| BnaA02g09810D:BnaCOMT1-2  | (1)   | -----                                                                              |
| Bra022700                 | (1)   | -----                                                                              |
| BnaC02g13760D:BnaCOMT1-7  | (1)   | -----                                                                              |
| Bol037465                 | (1)   | -----                                                                              |
| BnaA03g11990D:BnaCOMT1-4  | (1)   | -----                                                                              |
| Bra029041                 | (1)   | -----                                                                              |
| BnaC03g14720D:BnaCOMT1-8  | (1)   | -----                                                                              |
| Bol027968                 | (1)   | -----                                                                              |
| BnaA10g07250D:BnaCOMT1-6  | (787) | TCCAAAATAGATTTATATACTTATATAAATTAATTATTTTGTAGATTTAATATTATATAAAAAACATCTAGAATATATATGA |
| Bra003009                 | (788) | TCCAAAATAGATTTATATACTTATATAAATTAATTATTTTGTAGATTTAATATTATATAAAAAACATCTAGAATATATATGA |
| BnaAnng13760D:BnaCOMT1-1  | (1)   | -----                                                                              |
| Bra026320                 | (1)   | -----                                                                              |
| BnaC07g40930D:BnaCOMT1-9  | (1)   | -----                                                                              |
| Bol042352                 | (1)   | -----                                                                              |
| BnaC01g20290D:BnaCOMT1-12 | (1)   | -----                                                                              |
| Bol013098                 | (1)   | -----                                                                              |
| BnaA03g48770D:BnaCOMT1-3  | (1)   | -----                                                                              |
| Bra019031                 | (1)   | -----                                                                              |
|                           |       |                                                                                    |
| BnaA10g07270D:BnaCOMT1-5  | (1)   | -----                                                                              |
| Bra003007                 | (1)   | -----                                                                              |
| BnaC09g30360D:BnaCOMT1-10 | (1)   | -----                                                                              |
| Bol038837                 | (1)   | -----                                                                              |
| BnaA02g09810D:BnaCOMT1-2  | (1)   | -----                                                                              |
| Bra022700                 | (1)   | -----                                                                              |
| BnaC02g13760D:BnaCOMT1-7  | (1)   | -----                                                                              |
| Bol037465                 | (1)   | -----                                                                              |
| BnaA03g11990D:BnaCOMT1-4  | (1)   | -----                                                                              |
| Bra029041                 | (1)   | -----                                                                              |
| BnaC03g14720D:BnaCOMT1-8  | (1)   | -----                                                                              |
| Bol027968                 | (1)   | -----                                                                              |
| BnaA10g07250D:BnaCOMT1-6  | (867) | TACTTTTAAGTTTGTTTAAATACTTGAAAAATATATACAAAATAATCAAACGTAATATCTAAATAGTTAAAATATACTCAA  |
| Bra003009                 | (789) | TACTTTTAAGTTTGTTTAAATACTTGAAAAATATATACAAAATAATCAAACGTAATATCTAAATAGTTAAAATATACTCAA  |
| BnaAnng13760D:BnaCOMT1-1  | (1)   | -----                                                                              |
| Bra026320                 | (1)   | -----                                                                              |
| BnaC07g40930D:BnaCOMT1-9  | (1)   | -----                                                                              |
| Bol042352                 | (1)   | -----                                                                              |
| BnaC01g20290D:BnaCOMT1-12 | (1)   | -----                                                                              |
| Bol013098                 | (1)   | -----                                                                              |
| BnaA03g48770D:BnaCOMT1-3  | (1)   | -----                                                                              |
| Bra019031                 | (1)   | -----                                                                              |

BnaA10g07270D:BnaCOMT1-5 (1) -----  
Bra003007 (1) -----  
BnaC09g30360D:BnaCOMT1-10 (1) -----  
Bol038837 (1) -----  
BnaA02g09810D:BnaCOMT1-2 (1) -----  
Bra022700 (1) -----  
BnaC02g13760D:BnaCOMT1-7 (1) -----  
Bol037465 (1) -----  
BnaA03g11990D:BnaCOMT1-4 (1) -----  
Bra029041 (1) -----  
BnaC03g14720D:BnaCOMT1-8 (1) -----  
Bol027968 (1) -----  
BnaA10g07250D:BnaCOMT1-6 (947) AACTCCAAAACACTCTAAATAATTATTAATTATCTATCCAAATATTTAAACCAAACCAATTTATATGTTAAGTTAGGTAC  
Bra003009 (789) --CTCCAAAATACTTAAATAATTATTAATTATCTATCCAAATATTTAAACCAAACCAATTTATATGTTAAGTTAGGTAC  
BnaAnng13760D:BnaCOMT1-1 (1) -----  
Bra026320 (1) -----  
BnaC07g40930D:BnaCOMT1-9 (1) -----  
Bol042352 (1) -----  
BnaC01g20290D:BnaCOMT1-12 (1) -----  
Bol013098 (1) -----  
BnaA03g48770D:BnaCOMT1-3 (1) -----  
Bra019031 (1) -----  
  
BnaA10g07270D:BnaCOMT1-5 (1) -----  
Bra003007 (1) -----  
BnaC09g30360D:BnaCOMT1-10 (1) -----  
Bol038837 (1) -----  
BnaA02g09810D:BnaCOMT1-2 (1) -----  
Bra022700 (1) -----  
BnaC02g13760D:BnaCOMT1-7 (1) -----  
Bol037465 (1) -----  
BnaA03g11990D:BnaCOMT1-4 (1) -----  
Bra029041 (1) -----  
BnaC03g14720D:BnaCOMT1-8 (1) -----  
Bol027968 (1) -----  
BnaA10g07250D:BnaCOMT1-6 (1027) TCTAACATATGTTATCTAAATTTATATGTAGTATATTCATTTGTTTATAGTTTTTTTTTTAAATTAATAATAAAATAAA  
Bra003009 (867) TCTAACATATGTTATCTAAATTTATATGTAGTATATTCATTTTATAGATTTTTTTTTTAAATTAATAATAAAATAAA  
BnaAnng13760D:BnaCOMT1-1 (1) -----  
Bra026320 (1) -----  
BnaC07g40930D:BnaCOMT1-9 (1) -----  
Bol042352 (1) -----  
BnaC01g20290D:BnaCOMT1-12 (1) -----  
Bol013098 (1) -----  
BnaA03g48770D:BnaCOMT1-3 (1) -----  
Bra019031 (1) -----  
  
BnaA10g07270D:BnaCOMT1-5 (1) -----  
Bra003007 (1) -----  
BnaC09g30360D:BnaCOMT1-10 (1) -----  
Bol038837 (1) -----  
BnaA02g09810D:BnaCOMT1-2 (1) -----  
Bra022700 (1) -----  
BnaC02g13760D:BnaCOMT1-7 (1) -----  
Bol037465 (1) -----  
BnaA03g11990D:BnaCOMT1-4 (1) -----  
Bra029041 (1) -----  
BnaC03g14720D:BnaCOMT1-8 (1) -----  
Bol027968 (1) -----  
BnaA10g07250D:BnaCOMT1-6 (1107) TTTTAAATAAATTTAAATTGGTTATCCAAATCCAAACTGAATCCTCAAAGATTTGAACTAAACACGAAATCCCAAACAAA  
Bra003009 (947) TTTTAAATAAATTTAAATTGGTTATCCAAATCCAAACTGAATCCTCAAAGATTTGAACTAAACACGAAATCCCAAACAAA  
BnaAnng13760D:BnaCOMT1-1 (1) -----  
Bra026320 (1) -----  
BnaC07g40930D:BnaCOMT1-9 (1) -----  
Bol042352 (1) -----  
BnaC01g20290D:BnaCOMT1-12 (1) -----  
Bol013098 (1) -----  
BnaA03g48770D:BnaCOMT1-3 (1) -----  
Bra019031 (1) -----  
  
BnaA10g07270D:BnaCOMT1-5 (1) -----  
Bra003007 (1) -----  
BnaC09g30360D:BnaCOMT1-10 (1) -----  
Bol038837 (1) -----  
BnaA02g09810D:BnaCOMT1-2 (1) -----  
Bra022700 (1) -----  
BnaC02g13760D:BnaCOMT1-7 (1) -----  
Bol037465 (1) -----  
BnaA03g11990D:BnaCOMT1-4 (1) -----  
Bra029041 (1) -----  
BnaC03g14720D:BnaCOMT1-8 (1) -----  
Bol027968 (1) -----  
BnaA10g07250D:BnaCOMT1-6 (1187) CCCCAGAAACGAAACCCGAACGCCACCCCTAATCACTATTATATATCTCATATGTGTCATCATAGGTTACAAAAATATGT  
Bra003009 (1027) CCCCAGAAACGAAACCCGAACGCCACCCCTAATCACTATTATATATCTCATATGTGTCATCATAGGTTACAAAAATATGT  
BnaAnng13760D:BnaCOMT1-1 (1) -----  
Bra026320 (1) -----  
BnaC07g40930D:BnaCOMT1-9 (1) -----  
Bol042352 (1) -----  
BnaC01g20290D:BnaCOMT1-12 (1) -----  
Bol013098 (1) -----  
BnaA03g48770D:BnaCOMT1-3 (1) -----  
Bra019031 (1) -----

BnaA10g07270D:BnaCOMT1-5 (1) -----  
Bra003007 (1) -----  
BnaC09g30360D:BnaCOMT1-10 (1) -----  
Bol038837 (1) -----  
BnaA02g09810D:BnaCOMT1-2 (1) -----  
Bra022700 (1) -----  
BnaC02g13760D:BnaCOMT1-7 (1) -----  
Bol037465 (1) -----  
BnaA03g11990D:BnaCOMT1-4 (1) -----  
Bra029041 (1) -----  
BnaC03g14720D:BnaCOMT1-8 (1) -----  
Bol027968 (1) -----  
BnaA10g07250D:BnaCOMT1-6 (1267) GTTATCATATAATTAATCGTATTATATATGTACCATCAAATAGGTAATCTTATAATTAATAATATTTTATATGTACAATC  
Bra003009 (1107) GTTATCATATAATTAATCGTATTATATATGTACCATTAATAAGTAATCTTATAATTAATAATATTTTATATGTACAATC  
BnaAnng13760D:BnaCOMT1-1 (1) -----  
Bra026320 (1) -----  
BnaC07g40930D:BnaCOMT1-9 (1) -----  
Bol042352 (1) -----  
BnaC01g20290D:BnaCOMT1-12 (1) -----  
Bol013098 (1) -----  
BnaA03g48770D:BnaCOMT1-3 (1) -----  
Bra019031 (1) -----  
  
BnaA10g07270D:BnaCOMT1-5 (1) -----  
Bra003007 (1) -----  
BnaC09g30360D:BnaCOMT1-10 (1) -----  
Bol038837 (1) -----  
BnaA02g09810D:BnaCOMT1-2 (1) -----  
Bra022700 (1) -----  
BnaC02g13760D:BnaCOMT1-7 (1) -----  
Bol037465 (1) -----  
BnaA03g11990D:BnaCOMT1-4 (1) -----  
Bra029041 (1) -----  
BnaC03g14720D:BnaCOMT1-8 (1) -----  
Bol027968 (1) -----  
BnaA10g07250D:BnaCOMT1-6 (1347) ATATAAATGATCACATATATTTTAAATTC CAATATGAAATATAAAAACCATAATTTAAGTTGATGTTTGAAATF  
Bra003009 (1187) ATATAAATGATCACATATATTTTAAATTC CAATATGAAATATAAAAACCATAATTTAAGTTGATGTTTGAAATF  
BnaAnng13760D:BnaCOMT1-1 (1) -----  
Bra026320 (1) -----  
BnaC07g40930D:BnaCOMT1-9 (1) -----  
Bol042352 (1) -----  
BnaC01g20290D:BnaCOMT1-12 (1) -----  
Bol013098 (1) -----  
BnaA03g48770D:BnaCOMT1-3 (1) -----  
Bra019031 (1) -----  
  
BnaA10g07270D:BnaCOMT1-5 (1) -----  
Bra003007 (1) -----  
BnaC09g30360D:BnaCOMT1-10 (1) -----  
Bol038837 (1) -----  
BnaA02g09810D:BnaCOMT1-2 (1) -----  
Bra022700 (1) -----  
BnaC02g13760D:BnaCOMT1-7 (1) -----  
Bol037465 (1) -----  
BnaA03g11990D:BnaCOMT1-4 (1) -----  
Bra029041 (1) -----  
BnaC03g14720D:BnaCOMT1-8 (1) -----  
Bol027968 (1) -----  
BnaA10g07250D:BnaCOMT1-6 (1427) GGGCTTTGTATTGTAATTTCTTATATATATTGAAAACATTTTATAATGGTTATTGGAAAATATGTTAGTAAAAATCAA  
Bra003009 (1267) GGGCTTTGTATTGTAATTTCTTATATATATTGAAAACATTTTATAATGGTTATTAGAAAATATGTTAGTAAAAATCAA  
BnaAnng13760D:BnaCOMT1-1 (1) -----  
Bra026320 (1) -----  
BnaC07g40930D:BnaCOMT1-9 (1) -----  
Bol042352 (1) -----  
BnaC01g20290D:BnaCOMT1-12 (1) -----  
Bol013098 (1) -----  
BnaA03g48770D:BnaCOMT1-3 (1) -----  
Bra019031 (1) -----  
  
BnaA10g07270D:BnaCOMT1-5 (1) -----  
Bra003007 (1) -----  
BnaC09g30360D:BnaCOMT1-10 (1) -----  
Bol038837 (1) -----  
BnaA02g09810D:BnaCOMT1-2 (1) -----  
Bra022700 (1) -----  
BnaC02g13760D:BnaCOMT1-7 (1) -----  
Bol037465 (1) -----  
BnaA03g11990D:BnaCOMT1-4 (1) -----  
Bra029041 (1) -----  
BnaC03g14720D:BnaCOMT1-8 (1) -----  
Bol027968 (1) -----  
BnaA10g07250D:BnaCOMT1-6 (1507) TTTTGAATATATGTATATTTTGACTGAATTTTGATATAAAATAAATTTAAATTTATTATTTTGATTTGAATATATATAT  
Bra003009 (1347) TTTTGAATATATGTATATTTTGACTGAATTTTGATATAAAATAAATTTAAATTTATTATTTTGATTTGAATATATATAT  
BnaAnng13760D:BnaCOMT1-1 (1) -----  
Bra026320 (1) -----  
BnaC07g40930D:BnaCOMT1-9 (1) -----  
Bol042352 (1) -----  
BnaC01g20290D:BnaCOMT1-12 (1) -----  
Bol013098 (1) -----  
BnaA03g48770D:BnaCOMT1-3 (1) -----  
Bra019031 (1) -----

|                           |        |                                                                                    |
|---------------------------|--------|------------------------------------------------------------------------------------|
| BnaA10g07270D:BnaCOMT1-5  | (1)    | -----GTAAGTA-G                                                                     |
| Bra003007                 | (1)    | -----GTAAGTA-G                                                                     |
| BnaC09g30360D:BnaCOMT1-10 | (1)    | -----GTAAGTA-G                                                                     |
| Bol038837                 | (1)    | -----GTAAGTA-G                                                                     |
| BnaA02g09810D:BnaCOMT1-2  | (1)    | -----GTAAG                                                                         |
| Bra022700                 | (1)    | -----GTAAG                                                                         |
| BnaC02g13760D:BnaCOMT1-7  | (1)    | -----GTACG                                                                         |
| Bol037465                 | (1)    | -----GTACG                                                                         |
| BnaA03g11990D:BnaCOMT1-4  | (1)    | -----GTAAG                                                                         |
| Bra029041                 | (1)    | -----GTAAG                                                                         |
| BnaC03g14720D:BnaCOMT1-8  | (1)    | -----GTAAG                                                                         |
| Bol027968                 | (1)    | -----GTAAG                                                                         |
| BnaA10g07250D:BnaCOMT1-6  | (1587) | CAAGTAACATAAGCCCATTACTTTTTAATAATAATGTAATGAACTTCTAATTTTTATTAATAGCATAAGTCCATTATGTTTT |
| Bra003009                 | (1427) | CAAGTAACATAAGCCCATTACTTTTTAATAATAATGTAATGAACTTCTAATTTTTATTAATAGCATAAGTCCATTATGTTTT |
| BnaAnng13760D:BnaCOMT1-1  | (1)    | -----                                                                              |
| Bra026320                 | (1)    | -----                                                                              |
| BnaC07g40930D:BnaCOMT1-9  | (1)    | -----                                                                              |
| Bol042352                 | (1)    | -----                                                                              |
| BnaC01g20290D:BnaCOMT1-12 | (1)    | -----                                                                              |
| Bol013098                 | (1)    | -----                                                                              |
| BnaA03g48770D:BnaCOMT1-3  | (1)    | -----                                                                              |
| Bra019031                 | (1)    | -----                                                                              |
| BnaA10g07270D:BnaCOMT1-5  | (9)    | TATTTTC--TATATCACCAAGGAGAGTACTCATATATTTTCAAAGATCTCGTGTAAATCTAGTTAGAAAACTC--TTC     |
| Bra003007                 | (9)    | TATTTTC--TATATCACCAAGGAGAGTACTCATATATTTTCAAAGATCTCGTGTAAATCTAGTTAGAAAACTC--TTC     |
| BnaC09g30360D:BnaCOMT1-10 | (9)    | TATTTTC--TATATCACCAAGGAGAGTACTCATATATTTTCATAGATCTCGTGTAAATCTAGTTAGAAAACTC--TTC     |
| Bol038837                 | (9)    | TATTTTC--TATATCACCAAGGAGAGTACTCATATATTTTCATAGATCTCGTGTAAATCTAGTTAGAAAACTC--TTC     |
| BnaA02g09810D:BnaCOMT1-2  | (6)    | TATTTT--GATATTCACA--AATTATTATCATAGATTTCAAAACAGCTTTGTGCCAACCAAAGTTAGAAAACTA--TTC    |
| Bra022700                 | (6)    | TATTTT--GATATTCACA--AATTATTATCATAGATTTCAAAACAGCTTTGTGCCAACCAAAGTTAGAAAACTA--TTC    |
| BnaC02g13760D:BnaCOMT1-7  | (6)    | TATTTT--GATATTCACA--AATTATTATCATAGATTTCAAAACATCTTTGTGCCAACCCATGTTAGAAAACTA--TTC    |
| Bol037465                 | (6)    | TATTTT--GATATTCACA--AATTATTATCATAGATTTCAAAACATCTTTGTGCCAACCCATGTTAGAAAACTA--TTC    |
| BnaA03g11990D:BnaCOMT1-4  | (6)    | TTTTTACGATATACCAATG---A---CATCITTATTTGATGGATTTGTGCTATATCAAAGTTAGAAAAAAGCTTC        |
| Bra029041                 | (6)    | TTTTTACGATATACCAATG---A---CATCITTATTTGATGGATTTGTGCTATATCAAAGTTAGAAAAAAGCTTC        |
| BnaC03g14720D:BnaCOMT1-8  | (6)    | TTTTTTCGATATACCAAG---A---CATCITTATTTGGATAGATCTTTGTGCTATATCAAAGTTAGAAAAAAGCTTC      |
| Bol027968                 | (6)    | TTTTTTCGATATACCAAG---A---CATCITTATTTGGATAGATCTTTGTGCTATATCAAAGTTAGAAAAAAGCTTC      |
| BnaA10g07250D:BnaCOMT1-6  | (1667) | TTTTTCCAAATTTACTGCTATTAATATTTTCAAACAACACTATCTTTTAACTACTATCTAAGTTGCCAACAAAAGC       |
| Bra003009                 | (1507) | TTTTTCTAATTTACTGCTATTAATATTTTCAAACAACACTATCTTTTAACTACTATCTAAGTTGCCAACAAAAGC        |
| BnaAnng13760D:BnaCOMT1-1  | (1)    | -----                                                                              |
| Bra026320                 | (1)    | -----                                                                              |
| BnaC07g40930D:BnaCOMT1-9  | (1)    | -----                                                                              |
| Bol042352                 | (1)    | -----                                                                              |
| BnaC01g20290D:BnaCOMT1-12 | (1)    | -----                                                                              |
| Bol013098                 | (1)    | -----                                                                              |
| BnaA03g48770D:BnaCOMT1-3  | (1)    | -----                                                                              |
| Bra019031                 | (1)    | -----                                                                              |
| BnaA10g07270D:BnaCOMT1-5  | (85)   | TTT-----ACTTTTGATAATGTTGTTTCATAAGCTATGAT---G---TGAATAATAAT---ATGCGATTGTTAA         |
| Bra003007                 | (85)   | TTT-----ACTTTTGATAATGTTGTTTCATAAGCTATGAT---G---TGAATAATAAT---ATGCGATTGTTAA         |
| BnaC09g30360D:BnaCOMT1-10 | (85)   | TTT-----ACTTTTGATAATGTTGTTTCATAAGCTATGAT---G---TGAATAACAAT---ATGCGATTGTTAA         |
| Bol038837                 | (85)   | TTT-----ACTTTTGATAATGTTGTTTCATAAGCTATGAT---G---TGAATAACAAT---ATGCGATTGTTAA         |
| BnaA02g09810D:BnaCOMT1-2  | (81)   | TTT-----ATTATCGATAATGTTGTTTCATAAGCTATGCCTCCCTGGTTACCATATGC---AATTAATTGTTGAA        |
| Bra022700                 | (81)   | TTT-----ATTATCGATAATGTTGTTTCATAAGCTATGCCTCCCTGGTTACCATATGC---AATTAATTGTTGAA        |
| BnaC02g13760D:BnaCOMT1-7  | (82)   | TTT-----ATTTTTGATTAATGTTGTTTCATAAGCTATGCCTCCCTGGTTATCATCAT---ATGCAATTGTTGAA        |
| Bol037465                 | (82)   | TTT-----ATTTTTGATTAATGTTGTTTCATAAGCTATGCCTCCCTGGTTATCATCAT---ATGCAATTGTTGAA        |
| BnaA03g11990D:BnaCOMT1-4  | (78)   | TTAGAAAAAAGCTCTTGATAATGTTGTTTCATAAGCTATGGTCTCTGGTGAFTGTGAATC---ATGTGATGATTA        |
| Bra029041                 | (78)   | TTAGAAAAAAGCTCTTGATAATGTTGTTTCATAAGCTATGGTCTCTGGTGAFTGTGAATC---ATGTGATGATTA        |
| BnaC03g14720D:BnaCOMT1-8  | (78)   | TT-----CTT--TGATAATGTTGTTTCATAGCTATAGTCTTGGTGAFTGTGAATC---ATGTGATGATTA             |
| Bol027968                 | (78)   | TT-----CTT--TGATAATGTTGTTTCATAGCTATAGTCTTGGTGAFTGTGAATC---ATGTGATGATTA             |
| BnaA10g07250D:BnaCOMT1-6  | (1747) | TTAAAG-TACTTCTACTTTAATAAGATAATTTCAAGTTGAGATCCACGCTTTCGCTGGGTTGAGATCCAAGCTTTGC      |
| Bra003009                 | (1587) | TTAAAG-TACTTCTACTTTAATAAGATAATTTCAAGTTGAGATCCACGCTTTCGCTGGGTTGAGATCCAAGCTTTGC      |
| BnaAnng13760D:BnaCOMT1-1  | (1)    | -----                                                                              |
| Bra026320                 | (1)    | -----                                                                              |
| BnaC07g40930D:BnaCOMT1-9  | (1)    | -----                                                                              |
| Bol042352                 | (1)    | -----                                                                              |
| BnaC01g20290D:BnaCOMT1-12 | (1)    | -----                                                                              |
| Bol013098                 | (1)    | -----                                                                              |
| BnaA03g48770D:BnaCOMT1-3  | (1)    | -----                                                                              |
| Bra019031                 | (1)    | -----                                                                              |
| BnaA10g07270D:BnaCOMT1-5  | (146)  | AGGTAA-----A-GGTCAGAGAGTTG-GCCAC-----CAAGTGA-----CAATCAGCCAAAACA-----GA            |
| Bra003007                 | (146)  | AGGTAA-----A-GGTCAGAGAGTTG-GCCAC-----CAAGTGA-----CAATCAGCCAAAACA-----GA            |
| BnaC09g30360D:BnaCOMT1-10 | (146)  | AGGTAA-----AAGGTCAGAGAGTTG-GCCAC-----CAAGTGA-----CAATCAGCCAAAACA-----GA            |
| Bol038837                 | (146)  | AGGTAA-----AAGGTCAGAGAGTTG-GCCAC-----CAAGTGA-----CAATCAGCCAAAACA-----GA            |
| BnaA02g09810D:BnaCOMT1-2  | (147)  | AGGAAAGCC-GTAAGGTTAGAGAGTTA-GCCACGAAGTAGTGATCAAAAAGACAATCAAGTATCAACCATAAACAGA      |
| Bra022700                 | (147)  | AGGAAAGCC-GTAAGGTTAGAGAGTTA-GCCACGAAGTAGTGATCAAAAAGACAATCAAGTATCAACCATAAACAGA      |
| BnaC02g13760D:BnaCOMT1-7  | (147)  | ACTTAAACA-GACAATTAATGGAT-----AC-----GTGCTG-----TCCACTAAGAA-----GA                  |
| Bol037465                 | (147)  | ACTTAAACA-GACAATTAATGGAT-----AC-----GTGCTG-----TCCACTAAGAA-----GA                  |
| BnaA03g11990D:BnaCOMT1-4  | (155)  | ATTGAAATTGTGCAAGGTAAAAGATGAGAGAGATCCGGCACAAAG-----TGTGATGACAAATCA-----GA           |
| Bra029041                 | (155)  | ATTGAAATTGTGCAAGGTAAAAGATGAGAGAGATCCGGCACAAAG-----TGTGATGACAAATCA-----GA           |
| BnaC03g14720D:BnaCOMT1-8  | (142)  | ATTGAAATTGTGCAAGGTAAA-GATGAGAGAGATCCGGCACAAAG-----TGTGATGACAAATCA-----GA           |
| Bol027968                 | (142)  | ATTGAAATTGTGCAAGGTAAA-GATGAGAGAGATCCGGCACAAAG-----TGTGATGACAAATCA-----GA           |
| BnaA10g07250D:BnaCOMT1-6  | (1826) | GTGGGTTGAGACGAGTGTAAAATTATATATGTAGGTAAGGTTGTTCAATACAGATTTGATCTGGTTTCAGTTCA---      |
| Bra003009                 | (1643) | GTGGGTTGAGACGAGTGTAAAATTATATATGTAGGTAAGGTTGTTCAATACAGATTTGATCTGGTTTCAGTTCA---      |
| BnaAnng13760D:BnaCOMT1-1  | (1)    | -----                                                                              |
| Bra026320                 | (1)    | -----                                                                              |
| BnaC07g40930D:BnaCOMT1-9  | (1)    | -----                                                                              |
| Bol042352                 | (1)    | -----                                                                              |
| BnaC01g20290D:BnaCOMT1-12 | (1)    | -----                                                                              |
| Bol013098                 | (1)    | -----                                                                              |
| BnaA03g48770D:BnaCOMT1-3  | (1)    | -----                                                                              |
| Bra019031                 | (1)    | -----                                                                              |

BnaA10g07270D:BnaCOMT1-5 (195) CAAAATGATGTCG---TTTGGACACGTAATTGATACCTGCTGCCACTAA---GAAATATATTTATATACGA---T-TT  
 Bra003007 (195) CAAAATGATGTCG---TTTGGACACGTAATTGATACCTGCTGCCACTAA---GAAATATATTTATATACGA---T-TT  
 BnaC09g30360D:BnaCOMT1-10 (196) CAAAATGATGTCG---TTTGGACACGTAATTGATACCTGCTGCCACTAA---GAAATATATTTATATACGA---T-TT  
 Bol038837 (196) CAAAATGATGTCG---TTTGGACACGTAATTGATACCTGCTGCCACTAA---GAAATATATTTATATACGA---T-TT  
 BnaA02g09810D:BnaCOMT1-2 (225) CACATTGATGATGTAGTTTGGACACTTATCTATACTTCTGCCACTAA---ATAAATATATTTATATACCT-TTTTTT  
 Bra022700 (225) CACATTGATGATGTAGTTTGGACACTTATCTATACTTCTGCCACTAA---ATAAATATATTTATATACCT-TTTTTT  
 BnaC02g13760D:BnaCOMT1-7 (191) ---ATTGAT-----TCT-----ATTCTATACCTGCTGCCACTAA---AGAAATATATTTATATACCA---TTTTT  
 Bol037465 (191) ---ATTGAT-----TCT-----ATTCTATACCTGCTGCCACTAA---AGAAATATATTTATATACCA---TTTTT  
 BnaA03g11990D:BnaCOMT1-4 (218) CAAAATGATGTC---GTTGGACACGTTTCTATACTGCTGCCACTAA---AAAAATATATA-ATAT-----  
 Bra029041 (218) CAAAATGATGTC---GTTGGACACGTTTCTATACTGCTGCCACTAA---AAAAATATATA-ATAT-----  
 BnaC03g14720D:BnaCOMT1-8 (204) CAAAATGATGTC---GCTGGACACGTTTCTATACTGCTGCCACTAA---AAAGCTATCTA-ATAT-----  
 Bol027968 (204) CAAAATGATGTC---GCTGGACACGTTTCTATACTGCTGCCACTAA---AAAGCTATCTA-ATAT-----  
 BnaA10g07250D:BnaCOMT1-6 (1903) -GTTTTTTGGTATTTTGGTTTATAGAAATAGATAACATATTTAAACCAT-ATATATATAT--TGGTTGGTTCGGGC  
 Bra003009 (1720) -GTTTTTTGGTATTTTGGTTTATAGAAATAGATAACATATTTAAACCAT-ATATATATAT--TGGTTGGTTCGGGC  
 BnaAnng13760D:BnaCOMT1-1 (1) -----GTAAGTACAAAACCTAATAACACTAACATCAT-AAAAACCATT-CAATTTAATATAAGTGA  
 Bra026320 (1) -----GTAAGTACAAAACCTAATAACACTAACATCAT-AAAAACCATT-CAATTTAATATAAGTGA  
 BnaC07g40930D:BnaCOMT1-9 (1) -----GTATATAAAATATAAACCTT-TCAATTTCTAAGTGTATATTTTATATA  
 Bol042352 (1) -----GTATATAAAATATAAACCTT-TCAATTTCTAAGTGTATATTTTATATA  
 BnaC01g20290D:BnaCOMT1-12 (1) -----  
 Bol013098 (1) -----  
 BnaA03g48770D:BnaCOMT1-3 (1) -----  
 Bra019031 (1) -----

BnaA10g07270D:BnaCOMT1-5 (264) CTTTT---AGTGA-TT---AAATGAGCTCCATACATATAGAAAATGGTGTGTATCGTACAACAAAACAATAC  
 Bra003007 (264) CTTTT---AGTGA-TT---AAATGAGCTCCATACATATAGAAAATGGTGTGTATCGTACAACAAAACAATAC  
 BnaC09g30360D:BnaCOMT1-10 (268) CTTTT---AGTGA-TT---AAATGAGCTCCATACATAGATAAGAAAATGGTGTGTATCGTACAACAAAACAATAC  
 Bol038837 (268) CTTTT---AGTGA-TT---AAATGAGCTCCATACATAGATAAGAAAATGGTGTGTATCGTACAACAAAACAATAC  
 BnaA02g09810D:BnaCOMT1-2 (303) TTTTCTAAAGTGT-TTGGTTATACGAGTCCATAGT-GATTTTCTTTGGTTGTATCGTGC---CAAATCA-TAC  
 Bra022700 (302) TTTTCTAAAGTGT-TTGGTTATACGAGTCCATAGT-GATTTTCTTTGGTTGTATCGTGC---CAAATCA-TAC  
 BnaC02g13760D:BnaCOMT1-7 (248) TTTTCTTTAGAGG-TT---ATACGAGCTCCATAGT-GATTTTCTTTGGTTGTATCGTGC---CAAATCA-TAC  
 Bol037465 (248) TTTTCTTTAGAGG-TT---ATACGAGCTCCATAGT-GATTTTCTTTGGTTGTATCGTGC---CAAATCA-TAC  
 BnaA03g11990D:BnaCOMT1-4 (276) -TTTT---AGTGG-TT---AAGCGAGCTCTATCGT---GAAATTTTGGTTGTATCGTGC---CAAATCA-TAC  
 Bra029041 (276) -TTTT---AGTGG-TT---AAGCGAGCTCTATCGT---GAAATTTTGGTTGTATCGTGC---CAAATCA-TAC  
 BnaC03g14720D:BnaCOMT1-8 (262) -TTTT---AGTGG-TT---AAGCGAGCTCTATCGT---GAAATTTTGGTTGTATCGTGC---CAAATCA-TAC  
 Bol027968 (262) -TTTT---AGTGG-TT---AAGCGAGCTCTATCGT---GAAATTTTGGTTGTATCGTGC---CAAATCA-TAC  
 BnaA10g07250D:BnaCOMT1-6 (1979) TAACTGTCACT-T-TT---TTTATACAAAACCTTAAAC---TATATTTATCTGTTATAAATATTTTCAATTTAATTTG  
 Bra003009 (1798) TAACTGTCACT-T-TT---TTTATACAAAACCTTAAAC---TATATTTATCTGTTATAAATATTTTCAATTTAATTTG  
 BnaAnng13760D:BnaCOMT1-1 (64) CTTAATCTCAGT-G---CACCATAAAAAAACACAT-TTTAAAATAGAAAAAATATTTCTCTATATAGAAGT  
 Bra026320 (64) CTTAATCTCAGT-G---CACCATAAAAAAACACAT-TTTAAAATAGAAAAAATATTTCTCTATATAGAAGT  
 BnaC07g40930D:BnaCOMT1-9 (52) TAAATGATCACCT-TT---CAATATTCTAAGTGTATAT---TTTATATAAATATGATCACCTTTCAATATTCTAAGT  
 Bol042352 (52) TAAATGATCACCT-TT---CAATATTCTAAGTGTATAT---TTTATATAAATATGATCACCTTTCAATATTCTAAGT  
 BnaC01g20290D:BnaCOMT1-12 (1) ---GTAAGT---GC---AAAACCTAATAGATAATCC---TTTATATAAAT-AAAAAAGAAGTAGAAAACCTAATT  
 Bol013098 (1) ---GTAAGT---GC---AAAACCTAATAGATAATCC---TTTATATAAAT-AAAAAAGAAGTAGAAAACCTAATT  
 BnaA03g48770D:BnaCOMT1-3 (1) -----  
 Bra019031 (1) -----

**Repetitions** TCACCT-TT--CAATATTCTAAGTGTATAT--TTTATATAAATATGATCACCTTTCAATATTCTAAGT

BnaA10g07270D:BnaCOMT1-5 (334) AACTAATCGAAGAAAATCAACAA-TAGATGTTTGTAGTGGATCCCAGTCTAGAGAAC--TAGAAAAATACAAAT---  
 Bra003007 (334) AACTAATCGAAGAAAATCAACAA-TAGATGTTTGTAGTGGATCCCAGTCTAGAGAAC--TAGAAAAATACAAAT---  
 BnaC09g30360D:BnaCOMT1-10 (338) AACTAATCGAAGAAAATCAACAA-T-----CCC---CTAGAGAAC--TAGAAAAATACAAAT---  
 Bol038837 (338) AACTAATCGAAGAAAATCAACAA-T-----CCC---CTAGAGAAC--TAGAAAAATACAAAT---  
 BnaA02g09810D:BnaCOMT1-2 (378) AATCTAAA-GAATAATATTCAAAAA-GAAA-T-----ATTTTAGTTGAGG-TAGAG--AAAATTA---  
 Bra022700 (377) AATCTAAA-GAATAATATTCAAAAA-GAAA-T-----ATTTTAGTTGAGG-TAGAG--AAAATTA---  
 BnaC02g13760D:BnaCOMT1-7 (318) AATCTAAA-GAATAATATTCAAAAA-GAAA-T-----ATTTTGTGATCCC-TAGAGCTAGAGGAAA---  
 Bol037465 (318) AATCTAAA-GAATAATATTCAAAAA-GAAA-T-----ATTTTGTGATCCC-TAGAGCTAGAGGAAA---  
 BnaA03g11990D:BnaCOMT1-4 (331) AAAAATAAGAGGAAAATTAATAA-CACACTCTGT-----ACTTAGTTGTTTCATAGCTTTAATATTT---  
 Bra029041 (331) AAAAATAAGAGGAAAATTAATAA-CACACTCTGT-----ACTTAGTTGTTTCATAGCTTTAATATTT---  
 BnaC03g14720D:BnaCOMT1-8 (317) AAAAATAAGAGGAAAATTAATAA-CACACTCTGT-----ACTTAGTTGTTTCATAGCTTTAATATTT---  
 Bol027968 (317) AAAAATAAGAGGAAAATTAATAA-CACACTCTGT-----ACTTAGTTGTTTCATAGCTTTAATATTT---  
 BnaA10g07250D:BnaCOMT1-6 (2053) TATGATTAATAATTTGAATTTATTA---AACAGTACTATAATTTTAAATAGATGTTTCTATTTAATTAATTT---  
 Bra003009 (1872) TATGATTAATAATTTGAATTTATTA---AACAGTACTATAATTTTAAATAGATGTTTCTATTTAATTTAATAAT-TCA  
 BnaAnng13760D:BnaCOMT1-1 (136) TTTCTAAAAGGAAAATACGGGTTTGTAGTTCGTATAAATATGGATATTTGTGCAATCAAGTTTCTT-CTCTAA---  
 Bra026320 (136) TTTCTAAAAGGAAAATACGGGTTTGTAGTTCGTATAAATATGGATATTTGTGCAATCAAGTTTCTT-CTCTAA---  
 BnaC07g40930D:BnaCOMT1-9 (104) -----TTACACTAA-----  
 Bol042352 (127) TATATTTTATATAAATATGATCACCTTTCAATATCTAAGTGTATATTTTATATAT--AATATGATTAACACTAA  
 BnaC01g20290D:BnaCOMT1-12 (67) AATTAATAACTACTAACCTCAT---AAACTATTTCAACTTA-ATATGTTGGTTTTCATATTGATATAACAATC  
 Bol013098 (67) AATTAATAACTACTAACCTCAT---AAACTATTTCAACTTA-ATATGTTGGTTTTCATATTGATATAACAATC  
 BnaA03g48770D:BnaCOMT1-3 (1) -GTATATAAAATAT-----TCCA---CCAACTTGTATATTTGATAAAT--AGTATTAT  
 Bra019031 (1) -GTATATAAAATAT-----TCCA---CCAACTTGTATATTTGATAAAT--AGTATTAT

TATATTTTATATAAATATGATCACCTTTCAATATCTAAGTGTATATTTTATATAT--AATATGATTAACACTAA

BnaA10g07270D:BnaCOMT1-5 (407) -----  
 Bra003007 (407) -----  
 BnaC09g30360D:BnaCOMT1-10 (393) -----  
 Bol038837 (393) -----  
 BnaA02g09810D:BnaCOMT1-2 (433) -----  
 Bra022700 (432) -----  
 BnaC02g13760D:BnaCOMT1-7 (376) -----  
 Bol037465 (376) -----  
 BnaA03g11990D:BnaCOMT1-4 (396) -----  
 Bra029041 (396) -----  
 BnaC03g14720D:BnaCOMT1-8 (382) -----  
 Bol027968 (382) -----  
 BnaA10g07250D:BnaCOMT1-6 (2126) -----  
 Bra003009 (1948) AAATAACTAACAAATAAATATAAGATTATAATTCATGAGATGAAAACAAAAAGATTAACAATATAAATAACTAAAT  
 BnaAnng13760D:BnaCOMT1-1 (211) -----  
 Bra026320 (211) -----  
 BnaC07g40930D:BnaCOMT1-9 (113) -----  
 Bol042352 (201) -----  
 BnaC01g20290D:BnaCOMT1-12 (140) -----  
 Bol013098 (140) -----  
 BnaA03g48770D:BnaCOMT1-3 (49) -----  
 Bra019031 (49) -----

BnaA10g07270D:BnaCOMT1-5 (407) -----  
     Bra003007 (407) -----  
 BnaC09g30360D:BnaCOMT1-10 (393) -----  
     Bol038837 (393) -----  
 BnaA02g09810D:BnaCOMT1-2 (433) -----  
     Bra022700 (432) -----  
 BnaC02g13760D:BnaCOMT1-7 (376) -----  
     Bol037465 (376) -----  
 BnaA03g11990D:BnaCOMT1-4 (396) -----  
     Bra029041 (396) -----  
 BnaC03g14720D:BnaCOMT1-8 (382) -----  
     Bol027968 (382) -----  
 BnaA10g07250D:BnaCOMT1-6 (2126) -----  
     Bra003009 (2028) TTAGCAAAAATGTATGTCATGAAAGCTTTAGTTAAAAAAAATTATTCAGTTAACGTTTTAAATATTAAATCATA  
 BnaAnng13760D:BnaCOMT1-1 (211) -----  
     Bra026320 (211) -----  
 BnaC07g40930D:BnaCOMT1-9 (113) -----  
     Bol042352 (201) -----  
 BnaC01g20290D:BnaCOMT1-12 (140) -----  
     Bol013098 (140) -----  
 BnaA03g48770D:BnaCOMT1-3 (49) -----  
     Bra019031 (49) -----  
  
 BnaA10g07270D:BnaCOMT1-5 (407) -----  
     Bra003007 (407) -----  
 BnaC09g30360D:BnaCOMT1-10 (393) -----  
     Bol038837 (393) -----  
 BnaA02g09810D:BnaCOMT1-2 (433) -----  
     Bra022700 (432) -----  
 BnaC02g13760D:BnaCOMT1-7 (376) -----  
     Bol037465 (376) -----  
 BnaA03g11990D:BnaCOMT1-4 (396) -----  
     Bra029041 (396) -----  
 BnaC03g14720D:BnaCOMT1-8 (382) -----  
     Bol027968 (382) -----  
 BnaA10g07250D:BnaCOMT1-6 (2126) -----  
     Bra003009 (2108) CCAATAAACTGAACTATATATATATATATATATCATCAATTATATTATGTAATTTATGTATAACTACATTAATATATTTTAA  
 BnaAnng13760D:BnaCOMT1-1 (211) -----  
     Bra026320 (211) -----  
 BnaC07g40930D:BnaCOMT1-9 (113) -----  
     Bol042352 (201) -----  
 BnaC01g20290D:BnaCOMT1-12 (140) -----  
     Bol013098 (140) -----  
 BnaA03g48770D:BnaCOMT1-3 (49) -----  
     Bra019031 (49) -----  
  
 BnaA10g07270D:BnaCOMT1-5 (407) -----  
     Bra003007 (407) -----  
 BnaC09g30360D:BnaCOMT1-10 (393) -----  
     Bol038837 (393) -----  
 BnaA02g09810D:BnaCOMT1-2 (433) -----  
     Bra022700 (432) -----  
 BnaC02g13760D:BnaCOMT1-7 (376) -----  
     Bol037465 (376) -----  
 BnaA03g11990D:BnaCOMT1-4 (396) -----  
     Bra029041 (396) -----  
 BnaC03g14720D:BnaCOMT1-8 (382) -----  
     Bol027968 (382) -----  
 BnaA10g07250D:BnaCOMT1-6 (2126) -----  
     Bra003009 (2188) TCTTTTGGTTGGTGGATCAATTTATATACTGAATCATATTCATTTACGTATAACTATATTACTATACTAACTTGTACT  
 BnaAnng13760D:BnaCOMT1-1 (211) -----  
     Bra026320 (211) -----  
 BnaC07g40930D:BnaCOMT1-9 (113) -----  
     Bol042352 (201) -----  
 BnaC01g20290D:BnaCOMT1-12 (140) -----  
     Bol013098 (140) -----  
 BnaA03g48770D:BnaCOMT1-3 (49) -----  
     Bra019031 (49) -----  
  
 BnaA10g07270D:BnaCOMT1-5 (407) -----  
     Bra003007 (407) -----  
 BnaC09g30360D:BnaCOMT1-10 (393) -----  
     Bol038837 (393) -----  
 BnaA02g09810D:BnaCOMT1-2 (433) -----  
     Bra022700 (432) -----  
 BnaC02g13760D:BnaCOMT1-7 (376) -----  
     Bol037465 (376) -----  
 BnaA03g11990D:BnaCOMT1-4 (396) -----  
     Bra029041 (396) -----  
 BnaC03g14720D:BnaCOMT1-8 (382) -----  
     Bol027968 (382) -----  
 BnaA10g07250D:BnaCOMT1-6 (2126) -----  
     Bra003009 (2268) TAATGTAATCAAAGTTTTTTTATTTTATAATTAACCTAAAATAATTTTGGAAAATAGATCCCATCTTTCAAAGTAATA  
 BnaAnng13760D:BnaCOMT1-1 (211) -----  
     Bra026320 (211) -----  
 BnaC07g40930D:BnaCOMT1-9 (113) -----  
     Bol042352 (201) -----  
 BnaC01g20290D:BnaCOMT1-12 (140) -----  
     Bol013098 (140) -----  
 BnaA03g48770D:BnaCOMT1-3 (49) -----  
     Bra019031 (49) -----



BnaA10g07270D:BnaCOMT1-5 (407) -----  
     Bra003007 (407) -----  
 BnaC09g30360D:BnaCOMT1-10 (393) -----  
     Bol1038837 (393) -----  
 BnaA02g09810D:BnaCOMT1-2 (433) -----  
     Bra022700 (432) -----  
 BnaC02g13760D:BnaCOMT1-7 (376) -----  
     Bol1037465 (376) -----  
 BnaA03g11990D:BnaCOMT1-4 (396) -----  
     Bra029041 (396) -----  
 BnaC03g14720D:BnaCOMT1-8 (382) -----  
     Bol1027968 (382) -----  
 BnaA10g07250D:BnaCOMT1-6 (2126) -----  
     Bra003009 (2348) CCGAACATAATATATAAAATTTGTGATATAATTTCTTCAAGAATATTTTTTTTTTGGAAATATATACTTTCATATGTTCCAT  
 BnaAnng13760D:BnaCOMT1-1 (211) -----  
     Bra026320 (211) -----  
 BnaC07g40930D:BnaCOMT1-9 (113) -----  
     Bol1042352 (201) -----  
 BnaC01g20290D:BnaCOMT1-12 (140) -----  
     Bol1013098 (140) -----  
 BnaA03g48770D:BnaCOMT1-3 (49) -----  
     Bra019031 (49) -----  
  
 BnaA10g07270D:BnaCOMT1-5 (407) -----  
     Bra003007 (407) -----  
 BnaC09g30360D:BnaCOMT1-10 (393) -----  
     Bol1038837 (393) -----  
 BnaA02g09810D:BnaCOMT1-2 (433) -----  
     Bra022700 (432) -----  
 BnaC02g13760D:BnaCOMT1-7 (376) -----  
     Bol1037465 (376) -----  
 BnaA03g11990D:BnaCOMT1-4 (396) -----  
     Bra029041 (396) -----  
 BnaC03g14720D:BnaCOMT1-8 (382) -----  
     Bol1027968 (382) -----  
 BnaA10g07250D:BnaCOMT1-6 (2126) -----  
     Bra003009 (2428) AAATATATTGATTTTTCTTATTGTTAGGATATATTTATGACGATATATCTTTTTGATTCATATATACTTTGAAACAAAAA  
 BnaAnng13760D:BnaCOMT1-1 (211) -----  
     Bra026320 (211) -----  
 BnaC07g40930D:BnaCOMT1-9 (113) -----  
     Bol1042352 (201) -----  
 BnaC01g20290D:BnaCOMT1-12 (140) -----  
     Bol1013098 (140) -----  
 BnaA03g48770D:BnaCOMT1-3 (49) -----  
     Bra019031 (49) -----  
  
 BnaA10g07270D:BnaCOMT1-5 (407) -----  
     Bra003007 (407) -----  
 BnaC09g30360D:BnaCOMT1-10 (393) -----  
     Bol1038837 (393) -----  
 BnaA02g09810D:BnaCOMT1-2 (433) -----  
     Bra022700 (432) -----  
 BnaC02g13760D:BnaCOMT1-7 (376) -----  
     Bol1037465 (376) -----  
 BnaA03g11990D:BnaCOMT1-4 (396) -----  
     Bra029041 (396) -----  
 BnaC03g14720D:BnaCOMT1-8 (382) -----  
     Bol1027968 (382) -----  
 BnaA10g07250D:BnaCOMT1-6 (2126) -----  
     Bra003009 (2508) AATAGTAAGAAAGATATTTTTTATTTAATACAAATGAGTTGTATATTGCCAAATACAGATTTGAAGTCAACTTGTATATA  
 BnaAnng13760D:BnaCOMT1-1 (211) -----  
     Bra026320 (211) -----  
 BnaC07g40930D:BnaCOMT1-9 (113) -----  
     Bol1042352 (201) -----  
 BnaC01g20290D:BnaCOMT1-12 (140) -----  
     Bol1013098 (140) -----  
 BnaA03g48770D:BnaCOMT1-3 (49) -----  
     Bra019031 (49) -----  
  
 BnaA10g07270D:BnaCOMT1-5 (407) -----  
     Bra003007 (407) -----  
 BnaC09g30360D:BnaCOMT1-10 (393) -----  
     Bol1038837 (393) -----  
 BnaA02g09810D:BnaCOMT1-2 (433) -----  
     Bra022700 (432) -----  
 BnaC02g13760D:BnaCOMT1-7 (376) -----  
     Bol1037465 (376) -----  
 BnaA03g11990D:BnaCOMT1-4 (396) -----  
     Bra029041 (396) -----  
 BnaC03g14720D:BnaCOMT1-8 (382) -----  
     Bol1027968 (382) -----  
 BnaA10g07250D:BnaCOMT1-6 (2126) -----  
     Bra003009 (2588) ACGTGTATTGATTTAGTATTTGGTTTACATTTTCTCTCTAGGCTAATAAGAAAATTAATTGACTTCTAATCAGTCGACAG  
 BnaAnng13760D:BnaCOMT1-1 (211) -----  
     Bra026320 (211) -----  
 BnaC07g40930D:BnaCOMT1-9 (113) -----  
     Bol1042352 (201) -----  
 BnaC01g20290D:BnaCOMT1-12 (140) -----  
     Bol1013098 (140) -----  
 BnaA03g48770D:BnaCOMT1-3 (49) -----  
     Bra019031 (49) -----

|                           |        |                                                                                  |
|---------------------------|--------|----------------------------------------------------------------------------------|
| BnaA10g07270D:BnaCOMT1-5  | (407)  | -----                                                                            |
| Bra003007                 | (407)  | -----                                                                            |
| BnaC09g30360D:BnaCOMT1-10 | (393)  | -----                                                                            |
| Bol038837                 | (393)  | -----                                                                            |
| BnaA02g09810D:BnaCOMT1-2  | (433)  | -----                                                                            |
| Bra022700                 | (432)  | -----                                                                            |
| BnaC02g13760D:BnaCOMT1-7  | (376)  | -----                                                                            |
| Bol037465                 | (376)  | -----                                                                            |
| BnaA03g11990D:BnaCOMT1-4  | (396)  | -----                                                                            |
| Bra029041                 | (396)  | -----                                                                            |
| BnaC03g14720D:BnaCOMT1-8  | (382)  | -----                                                                            |
| Bol027968                 | (382)  | -----                                                                            |
| BnaA10g07250D:BnaCOMT1-6  | (2126) | -----                                                                            |
| Bra003009                 | (2668) | ATCATTGTTTTGATCTGGTCCGGTATAAAAAATAGTTGAATACTCAACTAAAATGGATTAACCAACTACATGTACGTTTT |
| BnaAnng13760D:BnaCOMT1-1  | (211)  | -----                                                                            |
| Bra026320                 | (211)  | -----                                                                            |
| BnaC07g40930D:BnaCOMT1-9  | (113)  | -----                                                                            |
| Bol042352                 | (201)  | -----                                                                            |
| BnaC01g20290D:BnaCOMT1-12 | (140)  | -----                                                                            |
| Bol013098                 | (140)  | -----                                                                            |
| BnaA03g48770D:BnaCOMT1-3  | (49)   | -----                                                                            |
| Bra019031                 | (49)   | -----                                                                            |
|                           |        |                                                                                  |
| BnaA10g07270D:BnaCOMT1-5  | (407)  | -----                                                                            |
| Bra003007                 | (407)  | -----                                                                            |
| BnaC09g30360D:BnaCOMT1-10 | (393)  | -----                                                                            |
| Bol038837                 | (393)  | -----                                                                            |
| BnaA02g09810D:BnaCOMT1-2  | (433)  | -----                                                                            |
| Bra022700                 | (432)  | -----                                                                            |
| BnaC02g13760D:BnaCOMT1-7  | (376)  | -----                                                                            |
| Bol037465                 | (376)  | -----                                                                            |
| BnaA03g11990D:BnaCOMT1-4  | (396)  | -----                                                                            |
| Bra029041                 | (396)  | -----                                                                            |
| BnaC03g14720D:BnaCOMT1-8  | (382)  | -----                                                                            |
| Bol027968                 | (382)  | -----                                                                            |
| BnaA10g07250D:BnaCOMT1-6  | (2126) | -----                                                                            |
| Bra003009                 | (2748) | GTACGTTTTGGCGTTGCACCATCATCCTACATAGATGTTTTGGACATGCCCAACATACAATTTAAAACCAACGAAGAAT  |
| BnaAnng13760D:BnaCOMT1-1  | (211)  | -----                                                                            |
| Bra026320                 | (211)  | -----                                                                            |
| BnaC07g40930D:BnaCOMT1-9  | (113)  | -----                                                                            |
| Bol042352                 | (201)  | -----                                                                            |
| BnaC01g20290D:BnaCOMT1-12 | (140)  | -----                                                                            |
| Bol013098                 | (140)  | -----                                                                            |
| BnaA03g48770D:BnaCOMT1-3  | (49)   | -----                                                                            |
| Bra019031                 | (49)   | -----                                                                            |
|                           |        |                                                                                  |
| BnaA10g07270D:BnaCOMT1-5  | (407)  | -----                                                                            |
| Bra003007                 | (407)  | -----                                                                            |
| BnaC09g30360D:BnaCOMT1-10 | (393)  | -----                                                                            |
| Bol038837                 | (393)  | -----                                                                            |
| BnaA02g09810D:BnaCOMT1-2  | (433)  | -----                                                                            |
| Bra022700                 | (432)  | -----                                                                            |
| BnaC02g13760D:BnaCOMT1-7  | (376)  | -----                                                                            |
| Bol037465                 | (376)  | -----                                                                            |
| BnaA03g11990D:BnaCOMT1-4  | (396)  | -----                                                                            |
| Bra029041                 | (396)  | -----                                                                            |
| BnaC03g14720D:BnaCOMT1-8  | (382)  | -----                                                                            |
| Bol027968                 | (382)  | -----                                                                            |
| BnaA10g07250D:BnaCOMT1-6  | (2126) | -----                                                                            |
| Bra003009                 | (2828) | TATCTGTACATGACAGTACAGAATAATAAACAGTTGAAACAAATATGTTTTGAGCATAACAACGTATAACTATCTTAA   |
| BnaAnng13760D:BnaCOMT1-1  | (211)  | -----                                                                            |
| Bra026320                 | (211)  | -----                                                                            |
| BnaC07g40930D:BnaCOMT1-9  | (113)  | -----                                                                            |
| Bol042352                 | (201)  | -----                                                                            |
| BnaC01g20290D:BnaCOMT1-12 | (140)  | -----                                                                            |
| Bol013098                 | (140)  | -----                                                                            |
| BnaA03g48770D:BnaCOMT1-3  | (49)   | -----                                                                            |
| Bra019031                 | (49)   | -----                                                                            |
|                           |        |                                                                                  |
| BnaA10g07270D:BnaCOMT1-5  | (407)  | -----AGAAAATACACTCTTTGTTTCATTTTTGTTTCA-----TCTAAACTA                             |
| Bra003007                 | (407)  | -----AGAAAATACACTCTTTGTTTCATTTTTGTTTCA-----TCTAAACTA                             |
| BnaC09g30360D:BnaCOMT1-10 | (393)  | -----AGAAAATACACTCTTTGTTTCATTTTTGTTTCAACTATACTATTAAAAAGATCTATACTA                |
| Bol038837                 | (393)  | -----AGAAAATACACTCTTTGTTTCATTTTTGTTTCAACTATACTATTAAAAAGATCTATACTA                |
| BnaA02g09810D:BnaCOMT1-2  | (433)  | -----                                                                            |
| Bra022700                 | (432)  | -----                                                                            |
| BnaC02g13760D:BnaCOMT1-7  | (376)  | -----                                                                            |
| Bol037465                 | (376)  | -----                                                                            |
| BnaA03g11990D:BnaCOMT1-4  | (396)  | -----                                                                            |
| Bra029041                 | (396)  | -----                                                                            |
| BnaC03g14720D:BnaCOMT1-8  | (382)  | -----                                                                            |
| Bol027968                 | (382)  | -----                                                                            |
| BnaA10g07250D:BnaCOMT1-6  | (2126) | -----                                                                            |
| Bra003009                 | (2908) | CAAACAATGCAGACAATTATTATTATGTCTAATTTGTATAAGGGATATGGCAGTGGGTCCATAAGTATCAATCTTAATAA |
| BnaAnng13760D:BnaCOMT1-1  | (211)  | -----                                                                            |
| Bra026320                 | (211)  | -----                                                                            |
| BnaC07g40930D:BnaCOMT1-9  | (113)  | -----                                                                            |
| Bol042352                 | (201)  | -----                                                                            |
| BnaC01g20290D:BnaCOMT1-12 | (140)  | -----                                                                            |
| Bol013098                 | (140)  | -----                                                                            |
| BnaA03g48770D:BnaCOMT1-3  | (49)   | -----                                                                            |
| Bra019031                 | (49)   | -----                                                                            |

|                           |        |                                                                                         |
|---------------------------|--------|-----------------------------------------------------------------------------------------|
| BnaA10g07270D:BnaCOMT1-5  | (448)  | TTAAAAAA-AATCACTCCAAAAATCTACTT-AAAAAATTTGTTGCACCTATTTCATTAACCAATTAATTTTTTTGGTCCTAC      |
| Bra003007                 | (448)  | TTAAAAAA-AATCACTCCAAAAATCTACTT-AAAAAATTTGTTGCACCTATTTCATTAACCAATTAATTTTTTTGGTCCTAC      |
| BnaC09g30360D:BnaCOMT1-10 | (452)  | TTAAAAAAGAATCACTCTAATAATGTACTTAAAAAAAATTTGTTGCACCTATTTCATTAACCAATTAATTTTTTTGATCCTAC     |
| Bol038837                 | (452)  | TTAAAAAAGAATCACTCTAATAATGTACTTAAAAAAAATTTGTTGCACCTATTTCATTAACCAATTAATTTTTTTGATCCTAC     |
| BnaA02g09810D:BnaCOMT1-2  | (433)  | -----                                                                                   |
| Bra022700                 | (432)  | -----                                                                                   |
| BnaC02g13760D:BnaCOMT1-7  | (376)  | -----                                                                                   |
| Bol037465                 | (376)  | -----                                                                                   |
| BnaA03g11990D:BnaCOMT1-4  | (396)  | -----                                                                                   |
| Bra029041                 | (396)  | -----                                                                                   |
| BnaC03g14720D:BnaCOMT1-8  | (382)  | -----                                                                                   |
| Bol027968                 | (382)  | -----                                                                                   |
| BnaA10g07250D:BnaCOMT1-6  | (2126) | -----                                                                                   |
| Bra003009                 | (2988) | GTTGTGTAAGAATACTTTTTAATGTTGTCAAAAAAATTTGTTGGTCTAAGGTTATATGTGTAGTTAATTAAGTATATGCTGATATGC |
| BnaAnng13760D:BnaCOMT1-1  | (211)  | -----                                                                                   |
| Bra026320                 | (211)  | -----                                                                                   |
| BnaC07g40930D:BnaCOMT1-9  | (113)  | -----                                                                                   |
| Bol042352                 | (201)  | -----                                                                                   |
| BnaC01g20290D:BnaCOMT1-12 | (140)  | -----                                                                                   |
| Bol013098                 | (140)  | -----                                                                                   |
| BnaA03g48770D:BnaCOMT1-3  | (49)   | -----                                                                                   |
| Bra019031                 | (49)   | -----                                                                                   |
|                           |        |                                                                                         |
| BnaA10g07270D:BnaCOMT1-5  | (526)  | CTTATATTTCTAATATATATCTAACTATACTAATCATAGTTAATGCTCTCTAACTATACATACTTTATTTTGAACCACC         |
| Bra003007                 | (527)  | CTTATATTTCTAATATATATCTAACTATACTAATCATAGTTAATGCTCTCTAACTATACATACTTTATTTTGAACCACC         |
| BnaC09g30360D:BnaCOMT1-10 | (532)  | TTTAAATTTCTTAATATTTATCTAACTATACTAATCATAGTTAATGCTCTCTAAACAATACATACTTTATTTTGAACCACC       |
| Bol038837                 | (532)  | TTTAAATTTCTTAATATTTATCTAACTATACTAATCATAGTTAATGCTCTCTAAACAATACATACTTTATTTTGAACCACC       |
| BnaA02g09810D:BnaCOMT1-2  | (433)  | -----                                                                                   |
| Bra022700                 | (432)  | -----                                                                                   |
| BnaC02g13760D:BnaCOMT1-7  | (376)  | -----                                                                                   |
| Bol037465                 | (376)  | -----                                                                                   |
| BnaA03g11990D:BnaCOMT1-4  | (396)  | -----                                                                                   |
| Bra029041                 | (396)  | -----                                                                                   |
| BnaC03g14720D:BnaCOMT1-8  | (382)  | -----                                                                                   |
| Bol027968                 | (382)  | -----                                                                                   |
| BnaA10g07250D:BnaCOMT1-6  | (2126) | -----                                                                                   |
| Bra003009                 | (3068) | ATAAAGATAGCTGTGAATTTATTATATGTCTGATTAATAAATTTTCTAGAGAATAAAAAGTTGGTCTAAGTTTGTCCAA         |
| BnaAnng13760D:BnaCOMT1-1  | (211)  | -----                                                                                   |
| Bra026320                 | (211)  | -----                                                                                   |
| BnaC07g40930D:BnaCOMT1-9  | (113)  | -----                                                                                   |
| Bol042352                 | (201)  | -----                                                                                   |
| BnaC01g20290D:BnaCOMT1-12 | (140)  | -----                                                                                   |
| Bol013098                 | (140)  | -----                                                                                   |
| BnaA03g48770D:BnaCOMT1-3  | (49)   | -----                                                                                   |
| Bra019031                 | (49)   | -----                                                                                   |
|                           |        |                                                                                         |
| BnaA10g07270D:BnaCOMT1-5  | (606)  | GTTATTTTTACCATCTATATATTATAGAAAA--ATCACTCCAAAAATCTACTTAAAAAAAATTTGTTTCACCTATTCATTAAC     |
| Bra003007                 | (607)  | GTTATTTTTACCATCTATATATTATAGAAAA--ATCACTCCAAAAATCTACTTAAAAAAAATTTGTTTCACCTATTCATTAAC     |
| BnaC09g30360D:BnaCOMT1-10 | (612)  | ATTATTTTTACCACTCTATACTATTAAAAAAGAATCATTTCCAAAAATCTACTTAAAAAAA-TTGTTCAGCTATTCATTAAC      |
| Bol038837                 | (612)  | ATTATTTTTACCATCTATACTATTAAAAAAGAATCATTTCCAAAAATCTACTTAAAAAAA-TTGTTCAGCTATTCATTAAC       |
| BnaA02g09810D:BnaCOMT1-2  | (433)  | -----                                                                                   |
| Bra022700                 | (432)  | -----                                                                                   |
| BnaC02g13760D:BnaCOMT1-7  | (376)  | -----                                                                                   |
| Bol037465                 | (376)  | -----                                                                                   |
| BnaA03g11990D:BnaCOMT1-4  | (396)  | -----                                                                                   |
| Bra029041                 | (396)  | -----                                                                                   |
| BnaC03g14720D:BnaCOMT1-8  | (382)  | -----                                                                                   |
| Bol027968                 | (382)  | -----                                                                                   |
| BnaA10g07250D:BnaCOMT1-6  | (2126) | -----                                                                                   |
| Bra003009                 | (3148) | ATTAGTTGTAAGACTGCCACGTAATCAAATATAGAGATTTAAAATAAAAATGCTGACAAATTCAGTAAAATTAATAATGTAAT     |
| BnaAnng13760D:BnaCOMT1-1  | (211)  | -----                                                                                   |
| Bra026320                 | (211)  | -----                                                                                   |
| BnaC07g40930D:BnaCOMT1-9  | (113)  | -----                                                                                   |
| Bol042352                 | (201)  | -----                                                                                   |
| BnaC01g20290D:BnaCOMT1-12 | (140)  | -----                                                                                   |
| Bol013098                 | (140)  | -----                                                                                   |
| BnaA03g48770D:BnaCOMT1-3  | (49)   | -----                                                                                   |
| Bra019031                 | (49)   | -----                                                                                   |
|                           |        |                                                                                         |
| BnaA10g07270D:BnaCOMT1-5  | (684)  | CAATTAT-TTTTTTGGCTCTATCTTATATTTTCTAATATTTATCTAACTATACTAACCATAGTTAATATTTCTCTAACTAT       |
| Bra003007                 | (685)  | CAATTATCTTTTTTGGCTCTATCTTATATTTTCTAATATTTATCTAACTATACTAACCATAGTTAATATTTCTCTAACTAT       |
| BnaC09g30360D:BnaCOMT1-10 | (691)  | CAATTAATTTTTTTGGTTCTACCTTATATTTCCCTAATATTTATCTAACTATACTAACCATAGTTAATGCCTCTCTAACTAT      |
| Bol038837                 | (691)  | CAATTAATTTTTTTGGTTCTACCTTATATTTCCCTAATATTTATCTAACTATACTAACCATAGTTAATGCCTCTCTAACTAT      |
| BnaA02g09810D:BnaCOMT1-2  | (433)  | -----                                                                                   |
| Bra022700                 | (432)  | -----                                                                                   |
| BnaC02g13760D:BnaCOMT1-7  | (376)  | -----                                                                                   |
| Bol037465                 | (376)  | -----                                                                                   |
| BnaA03g11990D:BnaCOMT1-4  | (396)  | -----                                                                                   |
| Bra029041                 | (396)  | -----                                                                                   |
| BnaC03g14720D:BnaCOMT1-8  | (382)  | -----                                                                                   |
| Bol027968                 | (382)  | -----                                                                                   |
| BnaA10g07250D:BnaCOMT1-6  | (2126) | -----                                                                                   |
| Bra003009                 | (3228) | TAATACAAAATAGAAGTTAGATCTTTTTAAATGATCTTCAAATCATATACAGTAGAACCTTTACAATTAATAATGTTGG         |
| BnaAnng13760D:BnaCOMT1-1  | (211)  | -----                                                                                   |
| Bra026320                 | (211)  | -----                                                                                   |
| BnaC07g40930D:BnaCOMT1-9  | (113)  | -----                                                                                   |
| Bol042352                 | (201)  | -----                                                                                   |
| BnaC01g20290D:BnaCOMT1-12 | (140)  | -----                                                                                   |
| Bol013098                 | (140)  | -----                                                                                   |
| BnaA03g48770D:BnaCOMT1-3  | (49)   | -----                                                                                   |
| Bra019031                 | (49)   | -----                                                                                   |

BnaA10g07270D:BnaCOMT1-5 (763) ACATACTTTATTTTGAACCACCGTTATTTTACCATCTACATATATACTAATTTTGGTATACCAAATTTTACATAC  
Bra003007 (765) ACATACTTTATTTTGAACCACCGTTATTTTACCATCTACATATATACTAATTTTGGTATAGCAAATTTTACATAC  
BnaC09g30360D:BnaCOMT1-10 (771) ACATACTTTATTTTGAACCACCATATTTTACAACTACATATATACTAATTTTGGTATACCAAATTTTACATAC  
Bol038837 (771) ACATACTTTATTTTGAACCACCATATTTTACAACTACATATATACTAATTTTGGTATACCAAATTTTACATAC  
BnaA02g09810D:BnaCOMT1-2 (433) -----  
Bra022700 (432) -----  
BnaC02g13760D:BnaCOMT1-7 (376) -----  
Bol037465 (376) -----  
BnaA03g11990D:BnaCOMT1-4 (396) -----  
Bra029041 (396) -----  
BnaC03g14720D:BnaCOMT1-8 (382) -----  
Bol027968 (382) -----  
BnaA10g07250D:BnaCOMT1-6 (2126) -----  
Bra003009 (3308) GACTTTTGAAAATTTATTAATATATAGAGATATTAATTTCTAAAAGTTTCATTATTTAGATTTTTATTTAAGATATAT  
BnaAnng13760D:BnaCOMT1-1 (211) -----  
Bra026320 (211) -----  
BnaC07g40930D:BnaCOMT1-9 (113) -----  
Bol042352 (201) -----  
BnaC01g20290D:BnaCOMT1-12 (140) -----  
Bol013098 (140) -----  
BnaA03g48770D:BnaCOMT1-3 (49) -----  
Bra019031 (49) -----  
-----  
BnaA10g07270D:BnaCOMT1-5 (843) ATAACCTCCATCATACTAATCCATATAAAATTCATTATACTAACATATGATCTTCTCTAACCGTATCTCATGAATCTCACGA  
Bra003007 (845) ATAACCTCCATCATACTAATCCATATAAAATTCATTATACTAACATATGATCTTCTCTAACCGTATCTCATGAATCTCACGA  
BnaC09g30360D:BnaCOMT1-10 (851) ATGACTCCATCATACTAATCCATATAAAATTCATTATACTAACATATGATCTTCTCTAACCGTATCTCATGAATCTCACGA  
Bol038837 (851) ATGACTCCATCATACTAATCCATATAAAATTCATTATACTAACATATGATCTTCTCTAACCGTATCTCATGAATCTCACGA  
BnaA02g09810D:BnaCOMT1-2 (433) -----  
Bra022700 (432) -----  
BnaC02g13760D:BnaCOMT1-7 (376) -----  
Bol037465 (376) -----  
BnaA03g11990D:BnaCOMT1-4 (396) -----  
Bra029041 (396) -----  
BnaC03g14720D:BnaCOMT1-8 (382) -----TTGTTGTATTCACTCTAGAGGTTTTTTTTTAGAAATTCGGTGGAGTAACATTTCTAAATTTTTTTGTTA  
Bol027968 (382) -----TTGTTGTATTCACTCTAGAGGTTTTTTTTTAGAAATTCGGTGGAGTAACATTTCTAAGTTTTTT-GTTA  
BnaA10g07250D:BnaCOMT1-6 (2126) -----  
Bra003009 (3388) ATATTCTAAGATAACAAAAATATTTGATTTTTGTGTATAGACATTAATCGTTTTCTCTGAAATTTGACATCTATATTA  
BnaAnng13760D:BnaCOMT1-1 (211) -----  
Bra026320 (211) -----  
BnaC07g40930D:BnaCOMT1-9 (113) -----  
Bol042352 (201) -----  
BnaC01g20290D:BnaCOMT1-12 (140) -----  
Bol013098 (140) -----  
BnaA03g48770D:BnaCOMT1-3 (49) -----  
Bra019031 (49) -----  
-----  
BnaA10g07270D:BnaCOMT1-5 (923) CCAAAACATTACTGATTTATCCAAATAAACAGAAATATATGTTTTGGGTGCCATTTTTCCATTTCATCCAACTGTG  
Bra003007 (925) CCAAAACATTACTGATTTATCCAAATAAACAGAAATATATGTTTTGGGTGCCATTTTTCCATTTCATCCAACTGTG  
BnaC09g30360D:BnaCOMT1-10 (931) CCAAAATATTACTAATTTATCCAAATAAAC-GAAA-----  
Bol038837 (931) CCAAAATATTACTAATTTATCCAAATAAAC-GAAA-----  
BnaA02g09810D:BnaCOMT1-2 (433) -----  
Bra022700 (432) -----  
BnaC02g13760D:BnaCOMT1-7 (376) -----  
Bol037465 (376) -----  
BnaA03g11990D:BnaCOMT1-4 (396) -----  
Bra029041 (396) -----  
BnaC03g14720D:BnaCOMT1-8 (451) CCAAAATAGTACTCAATAAAAAAATGACCAAAATAAATTTTATTAAATGGTAAAAATATATTTT-TACTTTAGAGTTAA  
Bol027968 (450) CCAAAATAGTACTCAATAAAAAAATAACAAAATAAATTTTATTAAATGGTAAAAATATATTTT-TACTTTAGAGTTAA  
BnaA10g07250D:BnaCOMT1-6 (2126) -----  
Bra003009 (3468) TTTTATTACATTATTTGGTGTATATAATAATGTTGGGACTTTGAAATTTTATTAATTTATAGAGATATTAATTTTAAAAA  
BnaAnng13760D:BnaCOMT1-1 (211) -----  
Bra026320 (211) -----  
BnaC07g40930D:BnaCOMT1-9 (113) -----  
Bol042352 (201) -----  
BnaC01g20290D:BnaCOMT1-12 (140) -----  
Bol013098 (140) -----  
BnaA03g48770D:BnaCOMT1-3 (49) -----  
Bra019031 (49) -----  
-----  
BnaA10g07270D:BnaCOMT1-5 (1003) TCTATTTAAACAAAAATCTCCTTTGATGCTGTGACCTGATACATTATAGCTTCACTTTAATAACGGAGAATGTAA  
Bra003007 (1005) TCTATTTAAACAAAAATCTCCTTTGATGCTGTGACCTGATACATTATAGCTTCACTTTAATAACGGAGAATGTAA  
BnaC09g30360D:BnaCOMT1-10 (965) -----ATTATAGCTTCGCTTTAATAACGGAGAATGTAA  
Bol038837 (965) -----ATTATAGCTTCGCTTTAATAACGGAGAATGTAA  
BnaA02g09810D:BnaCOMT1-2 (433) -----  
Bra022700 (432) -----  
BnaC02g13760D:BnaCOMT1-7 (376) -----  
Bol037465 (376) -----  
BnaA03g11990D:BnaCOMT1-4 (396) -----  
Bra029041 (396) -----  
BnaC03g14720D:BnaCOMT1-8 (530) CTAATCTAAACTTATGGTTTAGAGTTAAAGAGGTGGAGTTTTGGGGTAGGGTTTAAAAATAAAAAAAATTTAAATTTAA  
Bol027968 (529) CTAATCTAAACTTATGGTTTAGAGTTAAAGAGGTGGAGTTTTGGGGTAGGGTTTAAAAATAAAAAAAATTTAAATTTAA  
BnaA10g07250D:BnaCOMT1-6 (2126) -----  
Bra003009 (3548) AATTCATTATTTAGATTTCTTATTTTAAAGATATATTTTAAAAAGATAAGAAAAATTTGATTTTAGTGTATATCGTCA  
BnaAnng13760D:BnaCOMT1-1 (211) -----  
Bra026320 (211) -----  
BnaC07g40930D:BnaCOMT1-9 (113) -----  
Bol042352 (201) -----  
BnaC01g20290D:BnaCOMT1-12 (140) -----  
Bol013098 (140) -----  
BnaA03g48770D:BnaCOMT1-3 (49) -----  
Bra019031 (49) -----

|                           |        |                                                                                      |                                                                            |
|---------------------------|--------|--------------------------------------------------------------------------------------|----------------------------------------------------------------------------|
| BnaA10g07270D:BnaCOMT1-5  | (1083) | ATGTAATATTC                                                                          | AAACAATTTTTTTCCTCCTAAAGCAAAAATACGACATGTCAATACTTTTTTTCAAAAAACTCTTATTT       |
| Bra003007                 | (1085) | ATGTAATATTC                                                                          | AAACAATTTTTTTCCTCCTAAAGCAAAAATACGACATGTCAATACTTTTTTTCAAAAAACTCTTATTT       |
| BnaC09g30360D:BnaCOMT1-10 | (998)  | ATGTAATATTC                                                                          | AAACAATTTTTTTCCTCCTAAAGCAAAAATACGACATGTCAATACTTTTTTTCAAAAAACTCTTATTT       |
| Bol038837                 | (998)  | ATGTAATATTC                                                                          | AAACAATTTTTTTCCTCCTAAAGCAAAAATACGACATGTCAATACTTTTTTTCAAAAAACTCTTATTT       |
| BnaA02g09810D:BnaCOMT1-2  | (433)  | -----                                                                                | -----                                                                      |
| Bra022700                 | (432)  | -----                                                                                | -----                                                                      |
| BnaC02g13760D:BnaCOMT1-7  | (376)  | -----                                                                                | -----                                                                      |
| Bol037465                 | (376)  | -----                                                                                | -----                                                                      |
| BnaA03g11990D:BnaCOMT1-4  | (396)  | -----                                                                                | -----TTGTTGTA                                                              |
| Bra029041                 | (396)  | -----                                                                                | -----TTGTTGTA                                                              |
| BnaC03g14720D:BnaCOMT1-8  | (610)  | ATTTAAATTTT                                                                          | CAAAATAAAGAGGTTATTT-AGTTATTTTCTTTCTGGAAGACTATTTTGCAGAAAAAACTTAAATA         |
| Bol027968                 | (609)  | ATTTAAATTTT                                                                          | CAAAATAAAGAGGTTATTTAGTTATTTTCTTTCTGGAAGACTATTTTGCAGAAAAAACTTAAATA          |
| BnaA10g07250D:BnaCOMT1-6  | (2126) | -----                                                                                | -----TTGGTGTATATAATATATATATTTTCATAGAACTTAAATG                              |
| Bra003009                 | (3628) | TTTTCTGAAAT                                                                          | TGACATTTATATTAATTATATATATTTGGTGTATATAATATATATATTTTCATAGAACTTAAATG          |
| BnaAnng13760D:BnaCOMT1-1  | (211)  | -----                                                                                | -----                                                                      |
| Bra026320                 | (211)  | -----                                                                                | -----                                                                      |
| BnaC07g40930D:BnaCOMT1-9  | (113)  | -----                                                                                | -----                                                                      |
| Bol1042352                | (201)  | -----                                                                                | -----                                                                      |
| BnaC01g20290D:BnaCOMT1-12 | (140)  | -----                                                                                | -----                                                                      |
| Bol1013098                | (140)  | -----                                                                                | -----                                                                      |
| BnaA03g48770D:BnaCOMT1-3  | (49)   | -----                                                                                | -----                                                                      |
| Bra019031                 | (49)   | -----                                                                                | -----                                                                      |
|                           |        |                                                                                      |                                                                            |
| BnaA10g07270D:BnaCOMT1-5  | (1163) | ATCTCA---                                                                            | AAACCATAAATATTATTTTAAAAAACTATCTTAAAAATCTATTGTTAAAGTTGTTGTACCTATTCATTTT     |
| Bra003007                 | (1165) | ATCTCA---                                                                            | AAACCATAAATATTATTTTAAAAAACTATCTTAAAAATCTATTGTTAAAGTTGTTGTACCTATTCATTTT     |
| BnaC09g30360D:BnaCOMT1-10 | (1078) | ATCTCA---                                                                            | AAACCATAAATATTATTTTAAAAAACTATCTTAAAAATCTATTGTTAAAGTTGTTGTACCTATTCATTTT     |
| Bol038837                 | (1078) | ATCTCA---                                                                            | AAACCATAAATATTATTTTAAAAAACTATCTTAAAAATCTATTGTTAAAGTTGTTGTACCTATTCATTTT     |
| BnaA02g09810D:BnaCOMT1-2  | (433)  | -----                                                                                | -----ACAATATTTCTGGATGTTCCAG---AAAAAACTATTATA--TGAT--T                      |
| Bra022700                 | (432)  | -----                                                                                | -----ACAATATTTCTGGATGTTCCAG---AAAAAACTATTATA--TGAT--T                      |
| BnaC02g13760D:BnaCOMT1-7  | (376)  | -----                                                                                | -----ACAATATTTCTGGATGTTCCAG---AAAAAACTATTATA--TGAT--T                      |
| Bol037465                 | (376)  | -----                                                                                | -----ACAATATTTCTGGATGTTCCAG---AAAAAACTATTATA--TGAT--T                      |
| BnaA03g11990D:BnaCOMT1-4  | (404)  | TTCAATGT-AGAGGTTTTTTTTTTTTTTTGTGCAGAAAACACTCTCCATCATTATT--ATT--TTATTTTGTGT--TTCATTTT |                                                                            |
| Bra029041                 | (404)  | TTCAATGT-AGAGGTTTTTTTTTTTTTTTGTGCAGAAAACACTCTCCATCATTATT--ATT--TTATTTTGTGT--TTCATTTT |                                                                            |
| BnaC03g14720D:BnaCOMT1-8  | (689)  | AACATTTTGAAGAATTTTTTTTTTTTTTGTGCAGAAAACACTCTCTATTATTATT--ATT--TTATTTTGTGT--TTCATTTT  |                                                                            |
| Bol027968                 | (689)  | AACATTTTGAAGAATTTTTTTTTTTTTTGTGCAGAAAACACTCTCTATTATTATT--ATT--TTATTTTGTGT--TTCATTTT  |                                                                            |
| BnaA10g07250D:BnaCOMT1-6  | (2165) | TGGTTTTAAATATAAAATTAATAATCTCATCAAAAATATAAATGTTAAAGAA---AATATAAGATAAT--CCATT-G        |                                                                            |
| Bra003009                 | (3708) | TGGTTTTAAATATAAAATTAATAATCTCATCAAAAATATAAATGTTAAAGAA---AATATAAGATAAT--CCATT-G        |                                                                            |
| BnaAnng13760D:BnaCOMT1-1  | (211)  | -----                                                                                | -----GT--ATCTTGCTTTGATT--TGCATTTG                                          |
| Bra026320                 | (211)  | -----                                                                                | -----GT--ATCTTGCTTTGATT--TGCATTTG                                          |
| BnaC07g40930D:BnaCOMT1-9  | (113)  | -----                                                                                | -----TCAAGATACAAAG---TTTATAATGATA--CAT--A                                  |
| Bol1042352                | (201)  | -----                                                                                | -----TCAAGATACAAAG---TTTATAATGATA--CAT--A                                  |
| BnaC01g20290D:BnaCOMT1-12 | (140)  | -----                                                                                | -----TGAACGTATGTCG--GTACCATTAAAG---TGCATTTG                                |
| Bol013098                 | (140)  | -----                                                                                | -----TGAACGTATGTCG--GTACCATTAAAGGATGCAATTC                                 |
| BnaA03g48770D:BnaCOMT1-3  | (49)   | -----                                                                                | -----CAAAAACAAAG---TTTATAATGATA--CAT--A                                    |
| Bra019031                 | (49)   | -----                                                                                | -----CAAAAACAAAG---TTTATAATGATA--CAT--A                                    |
|                           |        |                                                                                      |                                                                            |
| BnaA10g07270D:BnaCOMT1-5  | (1240) | TAA                                                                                  | TTAATCATGCTTATAGT---A-ATAAGTTCGAACCAATCAATGATATAAAGTAATTAATCAACCA--        |
| Bra003007                 | (1242) | TAA                                                                                  | TTAATCATGCTTATAGT---A-ATAAGTTCGAACCAATCAATGATATAAAGTAATTAATCAACCA--        |
| BnaC09g30360D:BnaCOMT1-10 | (1148) | TAA                                                                                  | TTAATCATGCTTATAGT---A-ATAAGTTCGAACCAATCAATGATATAAAGTAATTAATCAACCA--        |
| Bol038837                 | (1148) | TAA                                                                                  | TTAATCATGCTTATAGT---A-ATAAGTTCGAACCAATCAATGATATAAAGTAATTAATCAACCA--        |
| BnaA02g09810D:BnaCOMT1-2  | (477)  | TCATTA--GATCTTGTGCTAAGCTAGCTAAACCTAGTTAGAAAAAAA--CTATCTTTATAATGATAAATGTTGTTT--       |                                                                            |
| Bra022700                 | (476)  | TCATTA--GATCTTGTGCTAAGCTAGCTAAACCTAGTTAGAAAAAAA--CTATCTTTATAATGATAAATGTTGTTT--       |                                                                            |
| BnaC02g13760D:BnaCOMT1-7  | (419)  | TCAGTATAGATCTTGTGCTAAGCTAGCTAAACCTAGTTAGAAAAAAA--CTATCTTTATAATGATAAATGTTGTTTCT       |                                                                            |
| Bol1037465                | (419)  | TCAGTATAGATCTTGTGCTAAGCTAGCTAAACCTAGTTAGAAAAAAA--CTATCTTTATAATGATAAATGTTGTTTCT       |                                                                            |
| BnaA03g11990D:BnaCOMT1-4  | (479)  | CTTGTCAACGTGTTTCATGGTTCTAATAAGGAAGATGTAATTGTTCTCCCTTATGAGGATCATTTAGGAAACT--          |                                                                            |
| Bra029041                 | (479)  | CTTGTCAACGTGTTTCATGGTTCTAATAAGGAAGATGTAATTGTTCTCCCTTATGAGGATCATTTAGGAAACT--          |                                                                            |
| BnaC03g14720D:BnaCOMT1-8  | (765)  | CTTGTCAACGTGTTTCATGGTTCTAATAAGGAAGATGTAATTGTTCTCCCTTATGAGGATCATTTAGGAAACT--          |                                                                            |
| Bol027968                 | (763)  | CTTGTCAACGTGTTTCATGGTTCTAATAAGGAAGATGTAATTGTTCTCCCTTATGAGGATCATTTAGGAAACT--          |                                                                            |
| BnaA10g07250D:BnaCOMT1-6  | (2239) | TGAGTATAAAACAACATATAATTAACATACTTATTTATATAAAATATGCAAGATAATAATATATTTTATGATTT           |                                                                            |
| Bra003009                 | (3782) | TGAGTATAAAACAACATATAATTAACATACTTATTTATATAAAATATGCAAGATAATAATATATTTTATGATTT           |                                                                            |
| BnaAnng13760D:BnaCOMT1-1  | (236)  | TTCA                                                                                 | TAAACAG-----                                                               |
| Bra026320                 | (236)  | TTCA                                                                                 | TAAACAG-----                                                               |
| BnaC07g40930D:BnaCOMT1-9  | (143)  | TGAGTCCAG                                                                            | -----                                                                      |
| Bol1042352                | (231)  | TGAGTCCAG                                                                            | -----                                                                      |
| BnaC01g20290D:BnaCOMT1-12 | (168)  | TTGAAGGA                                                                             | GGGATCCCATTCGATAAGGGATACGGTATGTCACCTCGTTTACCCTGGAAAGATCAGCGATTTGCAAAAT     |
| Bol1013098                | (178)  | TTGAAGGA                                                                             | GGGATCCCATTCGATAAGGGATACGGTATGTCACCTCGTTTACCCTGGAAAGATCAGCGATTTGCAAAAT     |
| BnaA03g48770D:BnaCOMT1-3  | (77)   | TGAGTGTAG                                                                            | -----                                                                      |
| Bra019031                 | (78)   | TGAGTGTAG                                                                            | -----                                                                      |
|                           |        |                                                                                      |                                                                            |
| BnaA10g07270D:BnaCOMT1-5  | (1314) | AATTTATGCGGACATTTGATA                                                                | TTCAAATATTTTTGGTCATATCATTAATTAATTTAACTATATAATATTTTTAATTGAA                 |
| Bra003007                 | (1316) | AATTTATGCGGACATTTGATA                                                                | TTCAAATATTTTTGGTCATATCATTAATTAATTTAACTATATAATATTTTTAATTGAA                 |
| BnaC09g30360D:BnaCOMT1-10 | (1222) | AATTTATGCGGACATTTGATA                                                                | TTCAAATATTTTTGGTCATATCATTAATTAATTTAACTATATAATATTTTTAATTGAA                 |
| Bol038837                 | (1222) | AATTTATGCGGACATTTGATA                                                                | TTCAAATATTTTTGGTCATATCATTAATTAATTTAACTATATAATATTTTTAATTGAA                 |
| BnaA02g09810D:BnaCOMT1-2  | (552)  | -ACTT                                                                                | GTTTCAG-----                                                               |
| Bra022700                 | (551)  | -ACTT                                                                                | GTTTCAG-----                                                               |
| BnaC02g13760D:BnaCOMT1-7  | (499)  | TACTCAT                                                                              | CCAACGATACTGTTTCAG-----                                                    |
| Bol1037465                | (499)  | TACTCAT                                                                              | CCAACGATACTGTTTCAG-----                                                    |
| BnaA03g11990D:BnaCOMT1-4  | (557)  | ATAATAAG                                                                             | AAGAGAACCGTCTCCGGTTATTTAG---CAGCTAGCAAAGGAATATAGAAACATAAT--TTCAAACCGGC     |
| Bra029041                 | (557)  | ATAATAAG                                                                             | AAGAGAACCGTCTCCGGTTATTTAG---CAGCTAGCAAAGGAATATAGAAACATAAT--TTCAAACCGGC     |
| BnaC03g14720D:BnaCOMT1-8  | (843)  | ATAATAAG                                                                             | AAGAGAACCGTCTCCGGTTATTTAG---CAGCTAGCAAAGGAATATAGAAACATAAT--TTCAAACCGGC     |
| Bol027968                 | (841)  | ATAATAAG                                                                             | AAGAGAACCGTCTCCGGTTATTTAG---CAGCTAGCAAAGGAATATAGAAACATAAT--TTCAAACCGGC     |
| BnaA10g07250D:BnaCOMT1-6  | (2319) | TAA                                                                                  | GGGACCATATATTTGCAATAAAGTTTCTAAAAAATATTATCTTATATTTTAAACGATTTTGTCAAATTTGAAAC |
| Bra003009                 | (3862) | TAA                                                                                  | GGGACCATATATTTGCAATAAAGTTTCTAAAAAATATTATCTTATATTTTAAACGATTTTGTCAAATTTGAAAC |
| BnaAnng13760D:BnaCOMT1-1  | (246)  | -----                                                                                | -----                                                                      |
| Bra026320                 | (246)  | -----                                                                                | -----                                                                      |
| BnaC07g40930D:BnaCOMT1-9  | (152)  | -----                                                                                | -----                                                                      |
| Bol1042352                | (240)  | -----                                                                                | -----                                                                      |
| BnaC01g20290D:BnaCOMT1-12 | (168)  | -----                                                                                | -----                                                                      |
| Bol1013098                | (258)  | GTA                                                                                  | TTAG-----                                                                  |
| BnaA03g48770D:BnaCOMT1-3  | (86)   | -----                                                                                | -----                                                                      |
| Bra019031                 | (87)   | -----                                                                                | -----                                                                      |

BnaA10g07270D:BnaCOMT1-5 (1394) TTTTACTATTACTCCTCATTTTCATGTGTTATATTTCTTCTCTAAATATTTTAAATTGATTTTGATAAAGAGTATTTAGAA  
Bra003007 (1396) TTTTACTATTACTCCTCATTTTCATGTGTTATATTTCTTCTCTAAATATTTTAAATTGATTTTGATAAAGAGTATTTAGAA  
BnaC09g30360D:BnaCOMT1-10 (1302) TTACTGTACTCCTCATTTTCATGTGATATATTTCTTCTCTAAATATTTTAAATTGATTTTCATAAGAAGTATTTGGAA  
Bol038837 (1302) TTACTGTACTCCTCATTTTCATGTGATATATTTCTTCTCTAAATATTTTAAATTGATTTTCATAAGAAGTATTTGGAA  
BnaA02g09810D:BnaCOMT1-2 (563) -----  
Bra022700 (562) -----  
BnaC02g13760D:BnaCOMT1-7 (526) -----  
Bol037465 (526) -----  
BnaA03g11990D:BnaCOMT1-4 (632) TGGTCTCTT--TGCATACCGGCAGCTCTATCATGATAACCAATTATAATCAACCTCAGGTGGATCAAGTCTGATCAATA  
Bra029041 (632) TGGTCTCTT--TGCATACCGGCAGCTCTATCATGATAACCAATTATAATCAACCTCAGGTGGATCAAGTCTGATCAATA  
BnaC03g14720D:BnaCOMT1-8 (918) TGGTCTCTT--TGCATACCGGCAGCTCTATCATGATAACCAATTATAATCAACCTCAGGTGGATCAAGTCTGATCAATA  
Bol027968 (916) TGGTCTCTT--TGCATACCGGCAGCTCTATCATGATAACCAATTATAATCAACCTCAGGTGGATCAAGTCTGATCAATA  
BnaA10g07250D:BnaCOMT1-6 (2399) GAAACCAAGTTGGGACTGGCAAAATTTATTAATTTATAGAGATAATTAATTTATAGAATATTAATTAATAGAGATTCTAC  
Bra003009 (3942) GAAACCAAGTTGGGACTGGCAAAATTTATTAATTTATAGAGATAATTAATTTATAGATTATTAATTAATAGAGATTCTAC  
BnaAnng13760D:BnaCOMT1-1 (246) -----  
Bra026320 (246) -----  
BnaC07g40930D:BnaCOMT1-9 (152) -----  
Bol042352 (240) -----  
BnaC01g20290D:BnaCOMT1-12 (168) -----  
Bol013098 (266) -----  
BnaA03g48770D:BnaCOMT1-3 (86) -----  
Bra019031 (87) -----  
  
BnaA10g07270D:BnaCOMT1-5 (1474) TAAAAATTTGTTATTTAAGAAAAAAA--TTAAACTATTTAAAAACCATATAAATCTATACTATTTAAATAGCCCAAAATCT  
Bra003007 (1476) TAAAAATTTGTTATTTAAGAAAAAAA--TTAAACTATTTAAAAACCATATAAATCTATACTATTTAAATAGCCCAAAATCT  
BnaC09g30360D:BnaCOMT1-10 (1382) TAAAAATTTGCTATTTAAGAAAAAAAATTTAAACTATTTAAAAACCATATAAATCTATACTATTTAAATTAACCAAAATCT  
Bol038837 (1382) TAAAAATTTGCTATTTAAGAAAAAAAATTTAAACTATTTAAAAACCATATAAATCTATACTATTTAAATTAACCAAAATCT  
BnaA02g09810D:BnaCOMT1-2 (563) -----  
Bra022700 (562) -----  
BnaC02g13760D:BnaCOMT1-7 (526) -----  
Bol037465 (526) -----  
BnaA03g11990D:BnaCOMT1-4 (710) GATTATCTTGAGATCAATTTATAAAA--AAATATCCTAAGTAGTG-ATAAATAAAAAACGGTTAGATTAAAGCTT--TGT  
Bra029041 (710) GATTATCTTGAGATCAATTTATAAAA--AAATATCCTAAGTAGTG-ATAAATAAAAAACGGTTAGATTAAAGCTT--TGT  
BnaC03g14720D:BnaCOMT1-8 (996) GATTATCGTGAGACCAATTTATAAAA--AAATATCCTAAGTAGTG-ATAAATAAAAAACGGTTAGATTAAAGCTT--TGT  
Bol027968 (994) GATTATCGTGAGATCAATTTATAAAA--AAATATCCTAAGTAGTG-ATAAATAAAAAACGGTTAGATTAAAGCTT--TGT  
BnaA10g07250D:BnaCOMT1-6 (2479) TGTATATAGGGGATTAGAAAAGACTATGTCTCAACAGTATAATATATATTTGATAGTTTCAATAAGTTATAATATAAAT  
Bra003009 (4022) TGTATATAGGGGATTAGAAAAGACTATGTCTCAACAGTATAATATATATTTGATAGTTTCAATAAGTTATAATATAAAT  
BnaAnng13760D:BnaCOMT1-1 (246) -----  
Bra026320 (246) -----  
BnaC07g40930D:BnaCOMT1-9 (152) -----  
Bol042352 (240) -----  
BnaC01g20290D:BnaCOMT1-12 (168) -----  
Bol013098 (266) -----  
BnaA03g48770D:BnaCOMT1-3 (86) -----  
Bra019031 (87) -----  
  
BnaA10g07270D:BnaCOMT1-5 (1553) GTCAATTAATTTTAAAGTCTCAACAACCTCAACAATATAATTCGTATAAAAATACACACAAAATATAAATAAGATAAAGTAG  
Bra003007 (1555) GTCAATTAATTTTAAAGTCTCAACAACCTCAACAATATAATTCGTATAAAAATACACACAAAATATAAATAAGATAAAGTAG  
BnaC09g30360D:BnaCOMT1-10 (1462) GCCAA---ATCTTAAAGTCTCAACAACCTCAACAATATAAATTCGTATAAAAATACACACAAAATATAAATAAGATAAAGTAG  
Bol038837 (1462) GCCAA---ATCTTAAAGTCTCAACAACCTCAACAATATAAATTCGTATAAAAATACACACAAAATATAAATAAGATAAAGTAG  
BnaA02g09810D:BnaCOMT1-2 (563) -----  
Bra022700 (562) -----  
BnaC02g13760D:BnaCOMT1-7 (526) -----  
Bol037465 (526) -----  
BnaA03g11990D:BnaCOMT1-4 (783) GTGAATGT-GTGTGTTTTCTTAAACTCATACCAACGATACTTGTTTCAG-----  
Bra029041 (783) GTGAATGT-GTGTGTTTTCTTAAACTCATACCAACGATACTTGTTTCAG-----  
BnaC03g14720D:BnaCOMT1-8 (1069) GTGAATGT-GTGTGTTTTCTTAAACTCATACCAAGATACTTGTTTCAG-----  
Bol027968 (1067) GTGAATGT-GTGTGTTTTCTTAAACTCATACCAAGATACTTGTTTCAG-----  
BnaA10g07250D:BnaCOMT1-6 (2559) GCAAATGTGTGCATACAATTTTCAAGACACATTTATAATTAGTGATAAAGACTTAATTTGATCTTTTAAAGAAAAATGTTGAT  
Bra003009 (4102) GCAAATGTGTGCATACAATTTTCAAGACACATTTATAATTAGTGATAAAGACTTAATTTGATCTTTTAAAGAAAAATGTTGAT  
BnaAnng13760D:BnaCOMT1-1 (246) -----  
Bra026320 (246) -----  
BnaC07g40930D:BnaCOMT1-9 (152) -----  
Bol042352 (240) -----  
BnaC01g20290D:BnaCOMT1-12 (168) -----  
Bol013098 (266) -----  
BnaA03g48770D:BnaCOMT1-3 (86) -----  
Bra019031 (87) -----  
  
BnaA10g07270D:BnaCOMT1-5 (1633) ATATGTGCATTTGGGTCTTGGGTTTGGTTATGTATTGGTTTCTTTCGGGTCCGGATCTTCTAGGTC--AAAGTTAAGG-  
Bra003007 (1635) ATATGTGCATTTGGGTCTTGGGTTTGGTTATGTATTGGTTTCTTTCGGGTCCGGATCTTCTAGGTC--AAAGTTAAGG-  
BnaC09g30360D:BnaCOMT1-10 (1538) ACATGTGCATTTGGGTCTTGGGTTTGGTTATGTATTGGTTTCTTTCGGGTCCGGATCTTCTAGGTC--AAAGTTAAGG-  
Bol038837 (1538) ACATGTGCATTTGGGTCTTGGGTTTGGTTATGTATTGGTTTCTTTCGGGTCCGGATCTTCTAGGTC--AAAGTTAAGG-  
BnaA02g09810D:BnaCOMT1-2 (563) -----  
Bra022700 (562) -----  
BnaC02g13760D:BnaCOMT1-7 (526) -----  
Bol037465 (526) -----  
BnaA03g11990D:BnaCOMT1-4 (831) -----  
Bra029041 (831) -----  
BnaC03g14720D:BnaCOMT1-8 (1117) -----  
Bol027968 (1115) -----  
BnaA10g07250D:BnaCOMT1-6 (2639) GGGTTAGTTAAGCTAAAGGAGAGATTGTTTGGTTTGGTTTGGTTTGGTTTAAACTCATGCCAAAGAGTTTGTTCGAG-----  
Bra003009 (4182) GGGTTAGTTAAGCTAAAGGAGAGATTGTTTGGTTTGGTTTGGTTTGGTTTAAACTCATGCCAAAGAGTTTGTTCGAG-----  
BnaAnng13760D:BnaCOMT1-1 (246) -----  
Bra026320 (246) -----  
BnaC07g40930D:BnaCOMT1-9 (152) -----  
Bol042352 (240) -----  
BnaC01g20290D:BnaCOMT1-12 (168) -----  
Bol013098 (266) -----  
BnaA03g48770D:BnaCOMT1-3 (86) -----  
Bra019031 (87) -----

BnaA10g07270D:BnaCOMT1-5 (1710) ---AGTGTGCTGTG-----TGTGTTTACTTAA--AACCATG-----CCAACATGACTTGTATAG-----  
Bra003007 (1712) ---AGTGTGCTGTG-----TGTGTTTACTTAA--AACCATG-----CCAACATGACTTGTATAG-----  
BnaC09g30360D:BnaCOMT1-10 (1617) CCAACTAGGTATTTCAAAAAATTTCAATACGTAATGGATCCGGGTATTTCTAAAAAGATTTGAAGTATCTGAAAACTCA  
Bol038837 (1617) CCAACTAGGTATTTCAAAAAATTTCAATACGTAATGGATCCGGGTATTTCTAAAAAGATTTGAAGTATCTGAAAACTCA  
BnaA02g09810D:BnaCOMT1-2 (563) -----  
Bra022700 (562) -----  
BnaC02g13760D:BnaCOMT1-7 (526) -----  
Bol037465 (526) -----  
BnaA03g11990D:BnaCOMT1-4 (831) -----  
Bra029041 (831) -----  
BnaC03g14720D:BnaCOMT1-8 (1117) -----  
Bol027968 (1115) -----  
BnaA10g07250D:BnaCOMT1-6 (2713) -----  
Bra003009 (4256) -----  
BnaAnng13760D:BnaCOMT1-1 (246) -----  
Bra026320 (246) -----  
BnaC07g40930D:BnaCOMT1-9 (152) -----  
Bol042352 (240) -----  
BnaC01g20290D:BnaCOMT1-12 (168) -----  
Bol013098 (266) -----  
BnaA03g48770D:BnaCOMT1-3 (86) -----  
Bra019031 (87) -----  
  
BnaA10g07270D:BnaCOMT1-5 (1761) -----  
Bra003007 (1763) -----  
BnaC09g30360D:BnaCOMT1-10 (1697) AAATATCTGAAACTCCAAACAAATACCCGGAAATATTTAAATACCAAACCTCTCTCCCCCCCCCCCCCCCCCTCCCAA  
Bol038837 (1697) AAATATCTGAAACTCCAAACAAATACCCGGAAATATTTAAATACCAAACCTCTCTCCCCCCCCCCCCCCCCCTCCCAA  
BnaA02g09810D:BnaCOMT1-2 (563) -----  
Bra022700 (562) -----  
BnaC02g13760D:BnaCOMT1-7 (526) -----  
Bol037465 (526) -----  
BnaA03g11990D:BnaCOMT1-4 (831) -----  
Bra029041 (831) -----  
BnaC03g14720D:BnaCOMT1-8 (1117) -----  
Bol027968 (1115) -----  
BnaA10g07250D:BnaCOMT1-6 (2713) -----  
Bra003009 (4256) -----  
BnaAnng13760D:BnaCOMT1-1 (246) -----  
Bra026320 (246) -----  
BnaC07g40930D:BnaCOMT1-9 (152) -----  
Bol042352 (240) -----  
BnaC01g20290D:BnaCOMT1-12 (168) -----  
Bol013098 (266) -----  
BnaA03g48770D:BnaCOMT1-3 (86) -----  
Bra019031 (87) -----  
  
BnaA10g07270D:BnaCOMT1-5 (1761) -----  
Bra003007 (1763) -----  
BnaC09g30360D:BnaCOMT1-10 (1777) ATTTTACCTGAAATCTAACGCAAGAACCAAAAAACACACTCAAAATTTTACCCGAATACCCAAAACAAAATTTAAACAAAA  
Bol038837 (1777) ATTTTACCTGAAATCTAACGCAAGAACCAAAAAACACACTCAAAATTTTACCCGAATACCCAAAACAAAATTTAAACAAAA  
BnaA02g09810D:BnaCOMT1-2 (563) -----  
Bra022700 (562) -----  
BnaC02g13760D:BnaCOMT1-7 (526) -----  
Bol037465 (526) -----  
BnaA03g11990D:BnaCOMT1-4 (831) -----  
Bra029041 (831) -----  
BnaC03g14720D:BnaCOMT1-8 (1117) -----  
Bol027968 (1115) -----  
BnaA10g07250D:BnaCOMT1-6 (2713) -----  
Bra003009 (4256) -----  
BnaAnng13760D:BnaCOMT1-1 (246) -----  
Bra026320 (246) -----  
BnaC07g40930D:BnaCOMT1-9 (152) -----  
Bol042352 (240) -----  
BnaC01g20290D:BnaCOMT1-12 (168) -----  
Bol013098 (266) -----  
BnaA03g48770D:BnaCOMT1-3 (86) -----  
Bra019031 (87) -----  
  
BnaA10g07270D:BnaCOMT1-5 (1761) -----  
Bra003007 (1763) -----  
BnaC09g30360D:BnaCOMT1-10 (1857) TTGAAATTTTATTCAAACCTGAAACTATCTGAAAACCAAACCAAATTTTTTAAAAATATTCGCAATACAGAAAAAA  
Bol038837 (1857) TTGAAATTTTATTCAAACCTGAAACTATCTGAAAACCAAACCAAATTTTTTAAAAATATTCGCAATACAGAAAAAA  
BnaA02g09810D:BnaCOMT1-2 (563) -----  
Bra022700 (562) -----  
BnaC02g13760D:BnaCOMT1-7 (526) -----  
Bol037465 (526) -----  
BnaA03g11990D:BnaCOMT1-4 (831) -----  
Bra029041 (831) -----  
BnaC03g14720D:BnaCOMT1-8 (1117) -----  
Bol027968 (1115) -----  
BnaA10g07250D:BnaCOMT1-6 (2713) -----  
Bra003009 (4256) -----  
BnaAnng13760D:BnaCOMT1-1 (246) -----  
Bra026320 (246) -----  
BnaC07g40930D:BnaCOMT1-9 (152) -----  
Bol042352 (240) -----  
BnaC01g20290D:BnaCOMT1-12 (168) -----  
Bol013098 (266) -----  
BnaA03g48770D:BnaCOMT1-3 (86) -----  
Bra019031 (87) -----

BnaA10g07270D:BnaCOMT1-5 (1761) -----  
Bra003007 (1763) -----  
BnaC09g30360D:BnaCOMT1-10 (1937) TATTCGAGATACGCAAATATACCTAATATACACAAAATATTTTAGGGTTTTAGGTACCCAGTCGGATCTCGAGCAGGATC  
Bol038837 (1937) TATTCGAGATACGCAAATATACCTAATATACACAAAATATTTTAGGGTTTTAGGTACCCAGTCGGATCTCGAGCAGGATC  
BnaA02g09810D:BnaCOMT1-2 (563) -----  
Bra022700 (562) -----  
BnaC02g13760D:BnaCOMT1-7 (526) -----  
Bol037465 (526) -----  
BnaA03g11990D:BnaCOMT1-4 (831) -----  
Bra029041 (831) -----  
BnaC03g14720D:BnaCOMT1-8 (1117) -----  
Bol027968 (1115) -----  
BnaA10g07250D:BnaCOMT1-6 (2713) -----  
Bra003009 (4256) -----  
BnaAnng13760D:BnaCOMT1-1 (246) -----  
Bra026320 (246) -----  
BnaC07g40930D:BnaCOMT1-9 (152) -----  
Bol042352 (240) -----  
BnaC01g20290D:BnaCOMT1-12 (168) -----  
Bol013098 (266) -----  
BnaA03g48770D:BnaCOMT1-3 (86) -----  
Bra019031 (87) -----  
  
BnaA10g07270D:BnaCOMT1-5 (1761) -----  
Bra003007 (1763) -----  
BnaC09g30360D:BnaCOMT1-10 (2017) CAAATTCAAACCAAAACCAACTCAGACTCGAACCGAGACCCACAGGTCCAAAAAAAATACCCACTAAGTATTTTACCCT  
Bol038837 (2017) CAAATTCAAACCAAAACCAACTCAGACTCGAACCGAGACCCACAGGTCCAAAAAAAATACCCACTAAGTATTTTACCCT  
BnaA02g09810D:BnaCOMT1-2 (563) -----  
Bra022700 (562) -----  
BnaC02g13760D:BnaCOMT1-7 (526) -----  
Bol037465 (526) -----  
BnaA03g11990D:BnaCOMT1-4 (831) -----  
Bra029041 (831) -----  
BnaC03g14720D:BnaCOMT1-8 (1117) -----  
Bol027968 (1115) -----  
BnaA10g07250D:BnaCOMT1-6 (2713) -----  
Bra003009 (4256) -----  
BnaAnng13760D:BnaCOMT1-1 (246) -----  
Bra026320 (246) -----  
BnaC07g40930D:BnaCOMT1-9 (152) -----  
Bol042352 (240) -----  
BnaC01g20290D:BnaCOMT1-12 (168) -----  
Bol013098 (266) -----  
BnaA03g48770D:BnaCOMT1-3 (86) -----  
Bra019031 (87) -----  
  
BnaA10g07270D:BnaCOMT1-5 (1761) -----  
Bra003007 (1763) -----  
BnaC09g30360D:BnaCOMT1-10 (2097) GGATCCGGATCCGAACCAACCTGTATTTTCAAGTCAACTTTAGTTTGGTTTCTCGGGTCCGGATAATATGTCAGGCCTA  
Bol038837 (2097) GGATCCGGATCCGAACCAACCTGTATTTTCAAGTCAACTTTAGTTTGGTTTCTCGGGTCCGGATAATATGTCAGGCCTA  
BnaA02g09810D:BnaCOMT1-2 (563) -----  
Bra022700 (562) -----  
BnaC02g13760D:BnaCOMT1-7 (526) -----  
Bol037465 (526) -----  
BnaA03g11990D:BnaCOMT1-4 (831) -----  
Bra029041 (831) -----  
BnaC03g14720D:BnaCOMT1-8 (1117) -----  
Bol027968 (1115) -----  
BnaA10g07250D:BnaCOMT1-6 (2713) -----  
Bra003009 (4256) -----  
BnaAnng13760D:BnaCOMT1-1 (246) -----  
Bra026320 (246) -----  
BnaC07g40930D:BnaCOMT1-9 (152) -----  
Bol042352 (240) -----  
BnaC01g20290D:BnaCOMT1-12 (168) -----  
Bol013098 (266) -----  
BnaA03g48770D:BnaCOMT1-3 (86) -----  
Bra019031 (87) -----  
  
BnaA10g07270D:BnaCOMT1-5 (1761) -----  
Bra003007 (1763) -----  
BnaC09g30360D:BnaCOMT1-10 (2177) GAAATAGCTACATAAAAGTGTACATACAAAAGTCTTAAATAAAATAATTTATAAATCTATAGTTTTAAATATATTCATT  
Bol038837 (2177) GAAATAGCTACATAAAAGTGTACATACAAAAGTCTTAAATAAAATAATTTATAAATCTATAGTTTTAAATATATTCATT  
BnaA02g09810D:BnaCOMT1-2 (563) -----  
Bra022700 (562) -----  
BnaC02g13760D:BnaCOMT1-7 (526) -----  
Bol037465 (526) -----  
BnaA03g11990D:BnaCOMT1-4 (831) -----  
Bra029041 (831) -----  
BnaC03g14720D:BnaCOMT1-8 (1117) -----  
Bol027968 (1115) -----  
BnaA10g07250D:BnaCOMT1-6 (2713) -----  
Bra003009 (4256) -----  
BnaAnng13760D:BnaCOMT1-1 (246) -----  
Bra026320 (246) -----  
BnaC07g40930D:BnaCOMT1-9 (152) -----  
Bol042352 (240) -----  
BnaC01g20290D:BnaCOMT1-12 (168) -----  
Bol013098 (266) -----  
BnaA03g48770D:BnaCOMT1-3 (86) -----  
Bra019031 (87) -----



BnaA10g07270D:BnaCOMT1-5 (1761) -----  
Bra003007 (1763) -----  
BnaC09g30360D:BnaCOMT1-10 (2257) TTCAGTATAATACGAATTTGTAACATAAAATATATAGCAATTTTAAATACTTATTCATATTAACTTTGTTTACATTCAA  
Bol038837 (2257) TTCAGTATAATACGAATTTGTAACATAAAATATATAGCAATTTTAAATACTTATTCATATTAACTTTGTTTACATTCAA  
BnaA02g09810D:BnaCOMT1-2 (563) -----  
Bra022700 (562) -----  
BnaC02g13760D:BnaCOMT1-7 (526) -----  
Bol037465 (526) -----  
BnaA03g11990D:BnaCOMT1-4 (831) -----  
Bra029041 (831) -----  
BnaC03g14720D:BnaCOMT1-8 (1117) -----  
Bol027968 (1115) -----  
BnaA10g07250D:BnaCOMT1-6 (2713) -----  
Bra003009 (4256) -----  
BnaAnng13760D:BnaCOMT1-1 (246) -----  
Bra026320 (246) -----  
BnaC07g40930D:BnaCOMT1-9 (152) -----  
Bol042352 (240) -----  
BnaC01g20290D:BnaCOMT1-12 (168) -----  
Bol013098 (266) -----  
BnaA03g48770D:BnaCOMT1-3 (86) -----  
Bra019031 (87) -----

BnaA10g07270D:BnaCOMT1-5 (1761) -----  
Bra003007 (1763) -----  
BnaC09g30360D:BnaCOMT1-10 (2337) AAAAAAGAATCCGGTCAAATCTAGTATGGCTTAAAAAGAGAAAGATGTAAGAGTAACAATTTAAGGAGTTGATTCCGA  
Bol038837 (2337) AAAAAAGAATCCGGTCAAATCTAGTATGGCTTAAAAAGAGAAAGATGTAAGAGTAACAATTTAAGGAGTTGATTCCGA  
BnaA02g09810D:BnaCOMT1-2 (563) -----  
Bra022700 (562) -----  
BnaC02g13760D:BnaCOMT1-7 (526) -----  
Bol037465 (526) -----  
BnaA03g11990D:BnaCOMT1-4 (831) -----  
Bra029041 (831) -----  
BnaC03g14720D:BnaCOMT1-8 (1117) -----  
Bol027968 (1115) -----  
BnaA10g07250D:BnaCOMT1-6 (2713) -----  
Bra003009 (4256) -----  
BnaAnng13760D:BnaCOMT1-1 (246) -----  
Bra026320 (246) -----  
BnaC07g40930D:BnaCOMT1-9 (152) -----  
Bol042352 (240) -----  
BnaC01g20290D:BnaCOMT1-12 (168) -----  
Bol013098 (266) -----  
BnaA03g48770D:BnaCOMT1-3 (86) -----  
Bra019031 (87) -----

BnaA10g07270D:BnaCOMT1-5 (1761) -----  
Bra003007 (1763) -----  
BnaC09g30360D:BnaCOMT1-10 (2417) ACCTAATATAAGAAGAGAATCGGTCTCCAGTTTTGAGCAACAAGAAAAGAAAATGGAAAACCTATATGATCTCTGGTT  
Bol038837 (2417) ACCTAATATAAGAAGAGAATCGGTCTCCAGTTTTGAGCAACAAGAAAAGAAAATGGAAAACCTATATGATCTCTGGTT  
BnaA02g09810D:BnaCOMT1-2 (563) -----  
Bra022700 (562) -----  
BnaC02g13760D:BnaCOMT1-7 (526) -----  
Bol037465 (526) -----  
BnaA03g11990D:BnaCOMT1-4 (831) -----  
Bra029041 (831) -----  
BnaC03g14720D:BnaCOMT1-8 (1117) -----  
Bol027968 (1115) -----  
BnaA10g07250D:BnaCOMT1-6 (2713) -----  
Bra003009 (4256) -----  
BnaAnng13760D:BnaCOMT1-1 (246) -----  
Bra026320 (246) -----  
BnaC07g40930D:BnaCOMT1-9 (152) -----  
Bol042352 (240) -----  
BnaC01g20290D:BnaCOMT1-12 (168) -----  
Bol013098 (266) -----  
BnaA03g48770D:BnaCOMT1-3 (86) -----  
Bra019031 (87) -----

BnaA10g07270D:BnaCOMT1-5 (1761) -----  
Bra003007 (1763) -----  
BnaC09g30360D:BnaCOMT1-10 (2497) TATGTTTTGGTTTTCTACTATTGAACCGGCTGGTCTCTTTGCATAGCGGCTGTACATCAGATTCACCAATTAACCTAAA  
Bol038837 (2497) TATGTTTTGGTTTTCTACTATTGAACCGGCTGGTCTCTTTGCATAGCGGCTGTACATCAGATTCACCAATTAACCTAAA  
BnaA02g09810D:BnaCOMT1-2 (563) -----  
Bra022700 (562) -----  
BnaC02g13760D:BnaCOMT1-7 (526) -----  
Bol037465 (526) -----  
BnaA03g11990D:BnaCOMT1-4 (831) -----  
Bra029041 (831) -----  
BnaC03g14720D:BnaCOMT1-8 (1117) -----  
Bol027968 (1115) -----  
BnaA10g07250D:BnaCOMT1-6 (2713) -----  
Bra003009 (4256) -----  
BnaAnng13760D:BnaCOMT1-1 (246) -----  
Bra026320 (246) -----  
BnaC07g40930D:BnaCOMT1-9 (152) -----  
Bol042352 (240) -----  
BnaC01g20290D:BnaCOMT1-12 (168) -----  
Bol013098 (266) -----  
BnaA03g48770D:BnaCOMT1-3 (86) -----  
Bra019031 (87) -----

BnaA10g07270D:BnaCOMT1-5 (1761) -----  
Bra003007 (1763) -----  
BnaC09g30360D:BnaCOMT1-10 (2577) CTGACCTGGATAAAGCCCTGATCATATAAACTAGAGTTCAATCTTGATATCAGTTTTAAACAGATTATCCTAATAATTG  
Bol038837 (2577) CTGACCTGGATAAAGCCCTGATCATATAAACTAGAGTTCAATCTTGATATCAGTTTTAAACAGATTATCCTAATAATTG  
BnaA02g09810D:BnaCOMT1-2 (563) -----  
Bra022700 (562) -----  
BnaC02g13760D:BnaCOMT1-7 (526) -----  
Bol037465 (526) -----  
BnaA03g11990D:BnaCOMT1-4 (831) -----  
Bra029041 (831) -----  
BnaC03g14720D:BnaCOMT1-8 (1117) -----  
Bol027968 (1115) -----  
BnaA10g07250D:BnaCOMT1-6 (2713) -----  
Bra003009 (4256) -----  
BnaAnng13760D:BnaCOMT1-1 (246) -----  
Bra026320 (246) -----  
BnaC07g40930D:BnaCOMT1-9 (152) -----  
Bol042352 (240) -----  
BnaC01g20290D:BnaCOMT1-12 (168) -----  
Bol013098 (266) -----  
BnaA03g48770D:BnaCOMT1-3 (86) -----  
Bra019031 (87) -----

BnaA10g07270D:BnaCOMT1-5 (1761) -----  
Bra003007 (1763) -----  
BnaC09g30360D:BnaCOMT1-10 (2657) ATGAACCAAAAGTTGAACAGTTTAGGTTAAAGCTTAAGGAGTGTGTGTGTTTACTTAAAATCATGCCAACATGACTTG  
Bol038837 (2657) ATGAACCAAAAGTTGAACAGTTTAGGTTAAAGCTTAAGGAGTGTGTGTGTTTACTTAAAATCATGCCAACATGACTTG  
BnaA02g09810D:BnaCOMT1-2 (563) -----  
Bra022700 (562) -----  
BnaC02g13760D:BnaCOMT1-7 (526) -----  
Bol037465 (526) -----  
BnaA03g11990D:BnaCOMT1-4 (831) -----  
Bra029041 (831) -----  
BnaC03g14720D:BnaCOMT1-8 (1117) -----  
Bol027968 (1115) -----  
BnaA10g07250D:BnaCOMT1-6 (2713) -----  
Bra003009 (4256) -----  
BnaAnng13760D:BnaCOMT1-1 (246) -----  
Bra026320 (246) -----  
BnaC07g40930D:BnaCOMT1-9 (152) -----  
Bol042352 (240) -----  
BnaC01g20290D:BnaCOMT1-12 (168) -----  
Bol013098 (266) -----  
BnaA03g48770D:BnaCOMT1-3 (86) -----  
Bra019031 (87) -----

BnaA10g07270D:BnaCOMT1-5 (1761) -----  
Bra003007 (1763) -----  
BnaC09g30360D:BnaCOMT1-10 (2737) TTATAG-----  
Bol038837 (2737) TTATAG-----  
BnaA02g09810D:BnaCOMT1-2 (563) -----  
Bra022700 (562) -----  
BnaC02g13760D:BnaCOMT1-7 (526) -----  
Bol037465 (526) -----  
BnaA03g11990D:BnaCOMT1-4 (831) -----  
Bra029041 (831) -----  
BnaC03g14720D:BnaCOMT1-8 (1117) -----  
Bol027968 (1115) -----  
BnaA10g07250D:BnaCOMT1-6 (2713) -----  
Bra003009 (4256) -----  
BnaAnng13760D:BnaCOMT1-1 (246) -----  
Bra026320 (246) -----  
BnaC07g40930D:BnaCOMT1-9 (152) -----  
Bol042352 (240) -----  
BnaC01g20290D:BnaCOMT1-12 (168) -----  
Bol013098 (266) -----  
BnaA03g48770D:BnaCOMT1-3 (86) -----  
Bra019031 (87) -----
